# Supplementary material for: Identification of Breast Cancer Subtype Specific MicroRNAs Using Survival Analysis to Find Their Role in Transcriptomic Regulation
Source: PubMed Central journal article supplement (PMC6837165; doi:10.3389/fgene.2019.01047), 2019-10-31
Supplement: DataSheet_1.pdf [file DataSheet_1.pdf]

# Supplementary Material: Integration of miRNA-seq and Clinical data to Identify Breast Cancer Subtype specific miRNAs using Survival Analysis and their Interactions with Genes and Transcription Factors

## 1 SUPPLEMENTARY TABLES AND FIGURES

### 1.1 Tables

**Table S1.** List of top 100 miRNAs for each breast cancer subtype after performing survival analysis. (Please see Excel file named 'Top100-miRNAs')

**Table S2.** The parameters of seven different classifiers

| Logistic Regression |             | Support Vector Machine |                  | Decision Tree         |          |
|---------------------|-------------|------------------------|------------------|-----------------------|----------|
| Parameter           | Value       | Parameter              | Value            | Parameter             | Value    |
| class_weight        | balanced    | class_weight           | balanced         | class_weight          | balanced |
| solver              | lbfgs       | Random Forest          |                  | Multilayer Perceptron |          |
| max_iter            | 200         |                        |                  | Parameter             | Value    |
| multi_class         | multinomial | class_weight           | balanced         | max_iter              | 1000     |
| KNN                 |             | Naïve Bayes            |                  | solver                | lbfgs    |
|                     |             |                        |                  | Parameter             | Value    |
| n_neighbors         | 3           | var_smoothing          | 10 <sup>-9</sup> |                       |          |

**Table S3.** Statistics of the samples of breast cancer stage for different subtypes. For the 1-star miRNAs only the patients with respective cancer subtype are used, while in case of the 4-star miRNAs all patients with stage data are used

| miRNA set | Breast cancer stage |     |     |    |
|-----------|---------------------|-----|-----|----|
|           | I                   | II  | III | IV |
| 4-star    | 46                  | 107 | 29  | 2  |
| 1-star LA | 30                  | 41  | 12  | 1  |
| 1-star LB | 5                   | 25  | 8   | 1  |
| 1-star H2 | 3                   | 13  | 6   | 0  |
| 1-star BL | 8                   | 28  | 3   | 0  |

**Table S4.** Results of Anova test on the stage-wise data for 4-star and 1-star miRNAs (Please see Excel file named 'Anova-Stage')

**Table S5.** Count of miRNAs, genes, and transcription factors (TFs) after specific steps of the filtering procedure

| miRNAs        | Steps     | miRNA | Gene | TF  |
|---------------|-----------|-------|------|-----|
| 4-star        | 1, 2      | 44    | 9300 | 126 |
|               | 3, 4, 5   | 36    | 8863 | 699 |
|               | 6, 7, 8   | 36    | 1027 | 93  |
|               | 9, 10, 11 | 21    | 80   | 15  |
| 1-star LA     | 1, 2      | 12    | 4447 | 558 |
|               | 3, 4, 5   | 8     | 3911 | 44  |
|               | 6, 7, 8   | 8     | 405  | 35  |
|               | 9, 10, 11 | 4     | 10   | 4   |
| 1-star LB     | 1, 2      | 14    | 3409 | 551 |
|               | 3, 4, 5   | 12    | 3164 | 50  |
|               | 6, 7, 8   | 12    | 316  | 36  |
|               | 9, 10, 11 | 9     | 17   | 7   |
| 1-star HER2-E | 1, 2      | 9     | 4204 | 570 |
|               | 3, 4, 5   | 7     | 3958 | 47  |
|               | 6, 7, 8   | 7     | 411  | 38  |
|               | 9, 10, 11 | 4     | 46   | 6   |
| 1-star BL     | 1, 2      | 15    | 4500 | 595 |
|               | 3, 4, 5   | 14    | 4500 | 35  |
|               | 6, 7, 8   | 14    | 344  | 34  |
|               | 9, 10, 11 | 7     | 41   | 4   |

**Table S6.** The detailed results of interactions of miRNA→Gene, TF→Gene, and TF→miRNA for 4-star and 1-star miRNAs as well as for the combined networks

| miRNA set        | File                                            |
|------------------|-------------------------------------------------|
| Combined network | Excel file named 'Combined_miRNA_Query_details' |
| 4-star           | Excel file named '44_miRNA_Query_details'       |
| 1-star LA        | Excel file named 'LA_miRNA_Query_details'       |
| 1-star LB        | Excel file named 'LB_miRNA_Query_details'       |
| 1-star HER2-E    | Excel file named 'H2_miRNA_Query_details'       |
| 1-star BL        | Excel file named 'BL_miRNA_Query_details'       |

**Table S7.** The Transcription factors identified as the result of filtering procedure, in each for 4-star and 1-star miRNA sets, and the common set (Please see the Excel file named 'TF-Common')

**Table S8.** The detailed results of PPI interaction analysis for 4-star and 1-star miRNAs (Please see the Excel file named 'PPI-Interaction')

**Table S9.** The detailed results of KEGG Pathway Analysis, from gene perspective, for 4-star and 1-star miRNAs (Please see the Excel file named 'KEGG')

**Table S10.** The detailed results of GO Enrichment Analysis, from gene perspective, for 4-star and 1-star miRNAs

| miRNAs        | File                         |
|---------------|------------------------------|
| 4-star        | Excel file named 'GO-44'     |
| 1-star LA     | Excel file named 'GO-LA'     |
| 1-star LB     | Excel file named 'GO-LB'     |
| 1-star HER2-E | Excel file named 'GO-HER2-E' |
| 1-star BL     | Excel file named 'GO-BL'     |

## 1.2 Figures

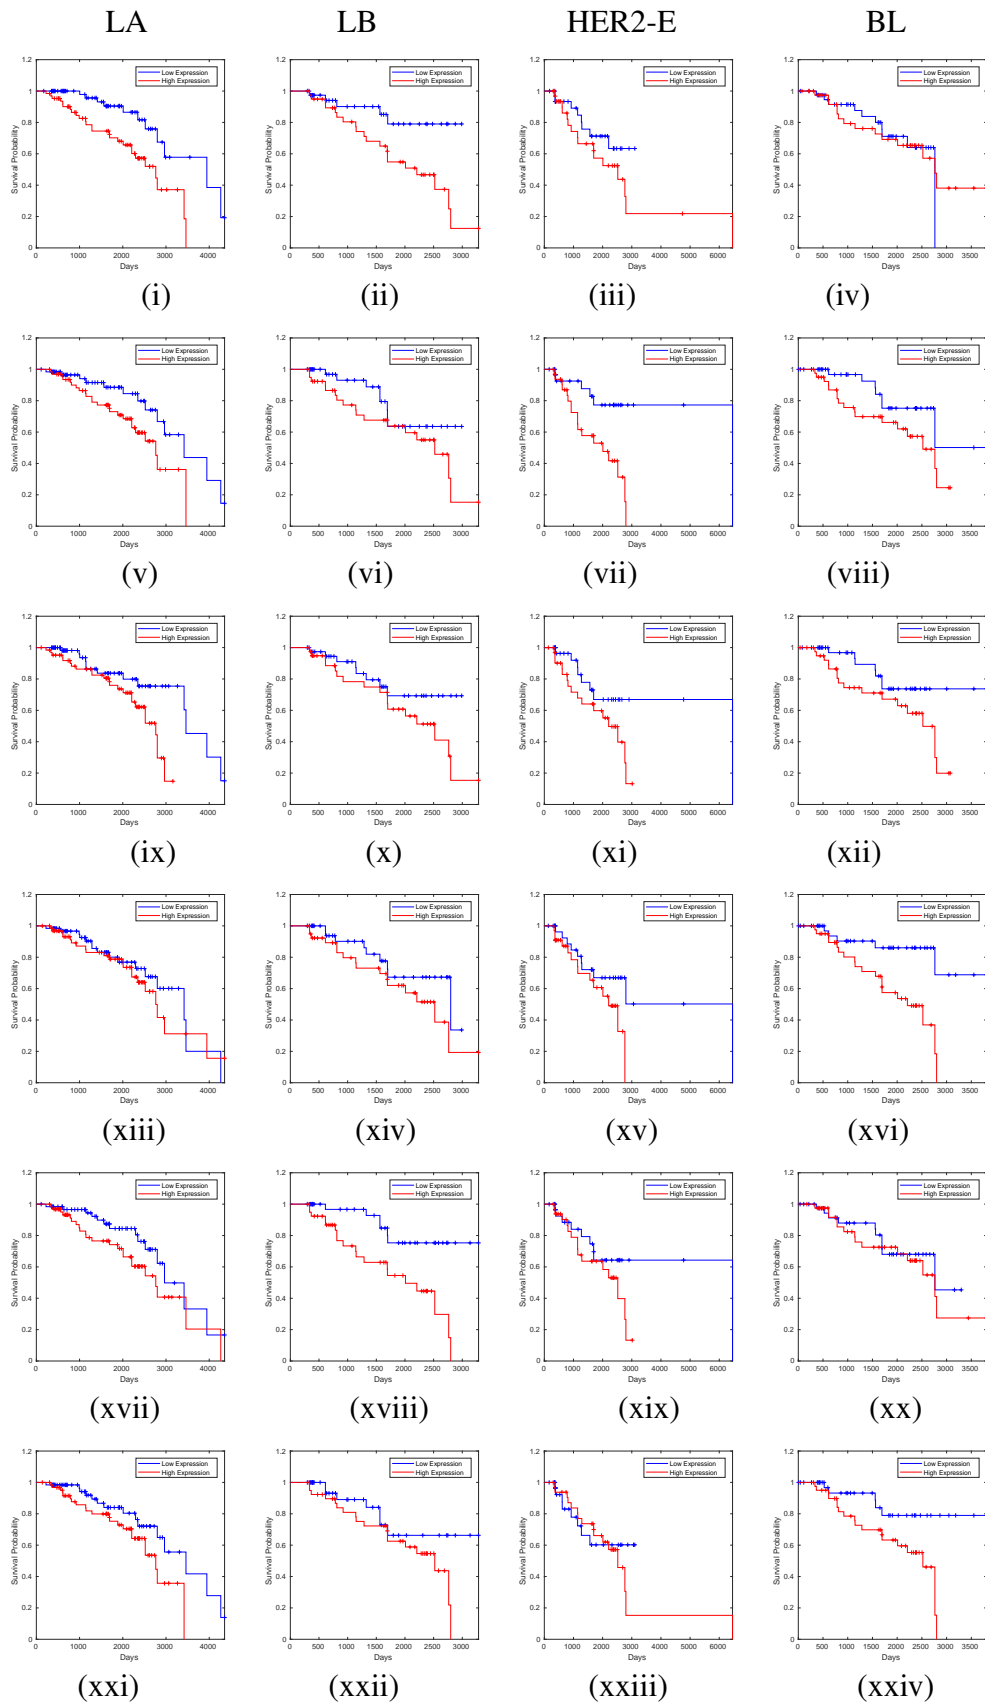

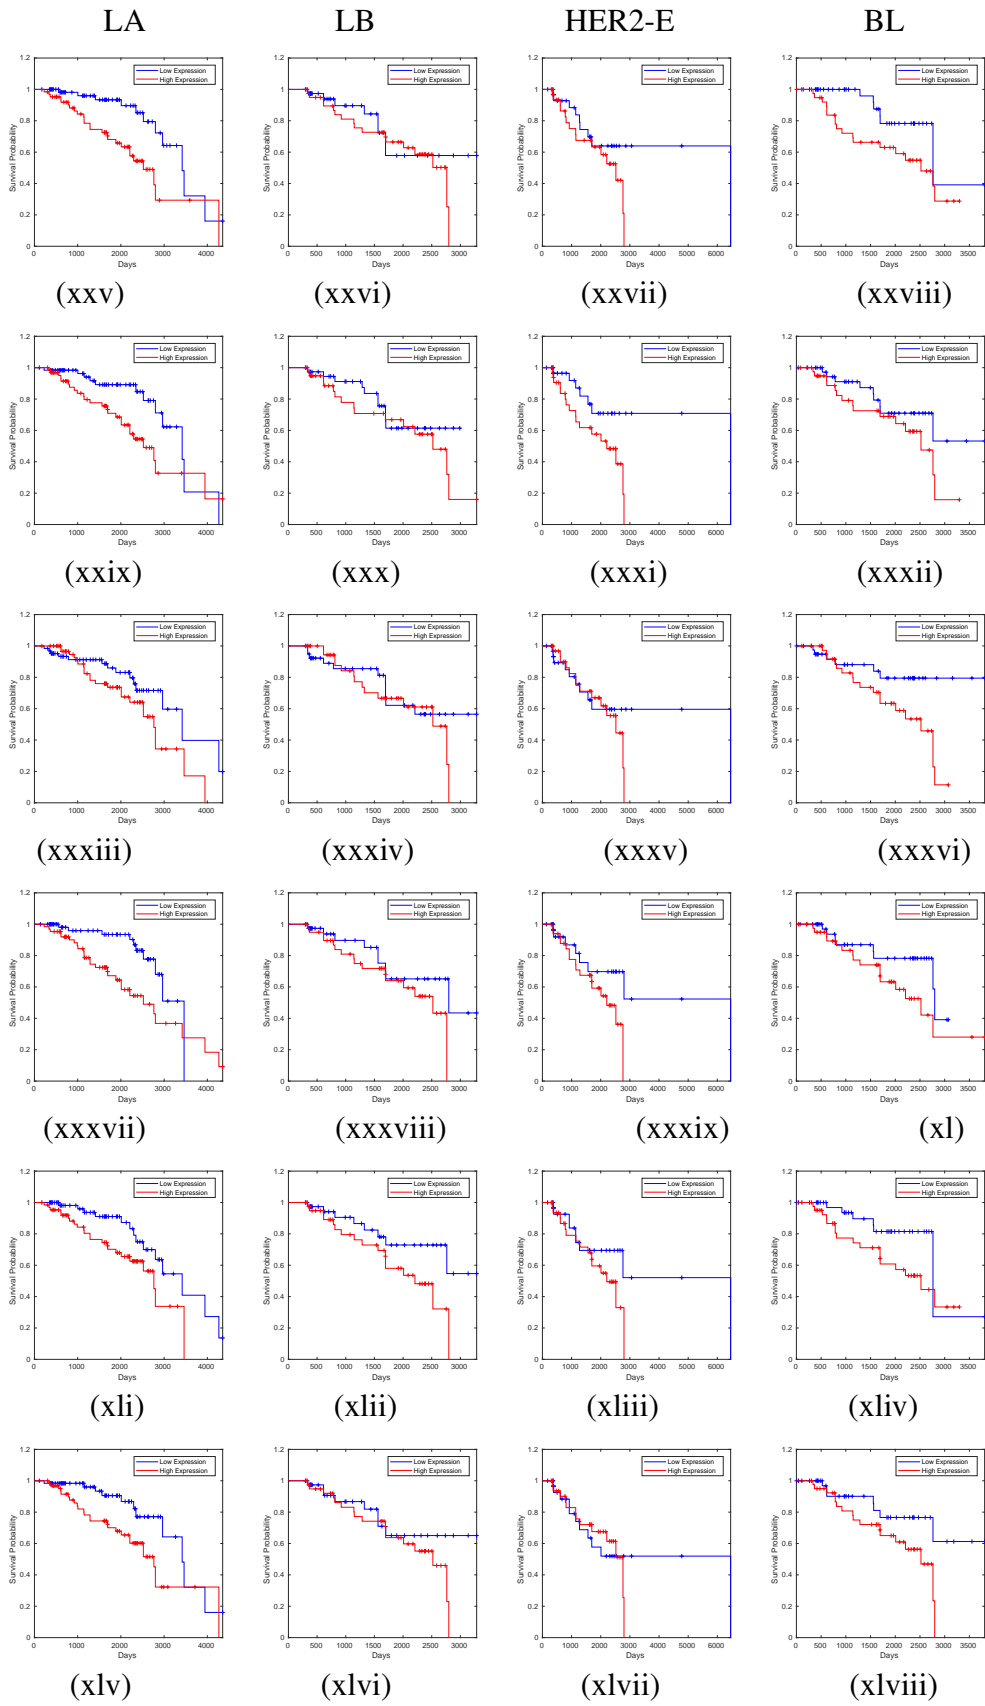

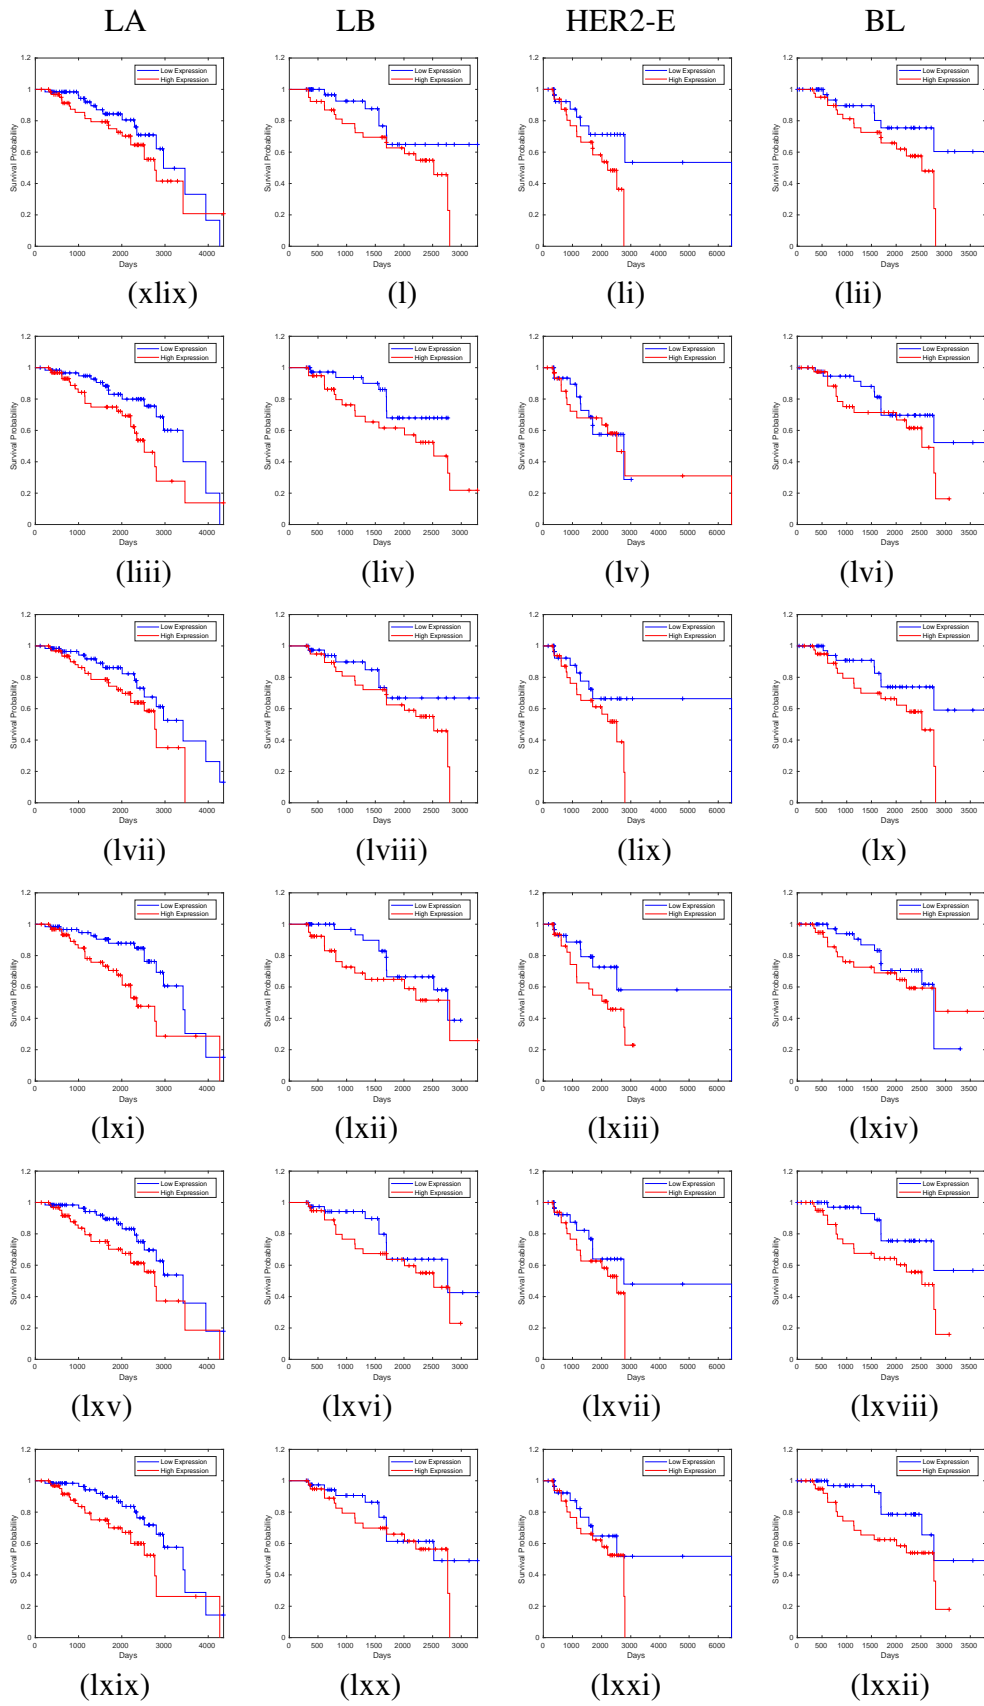

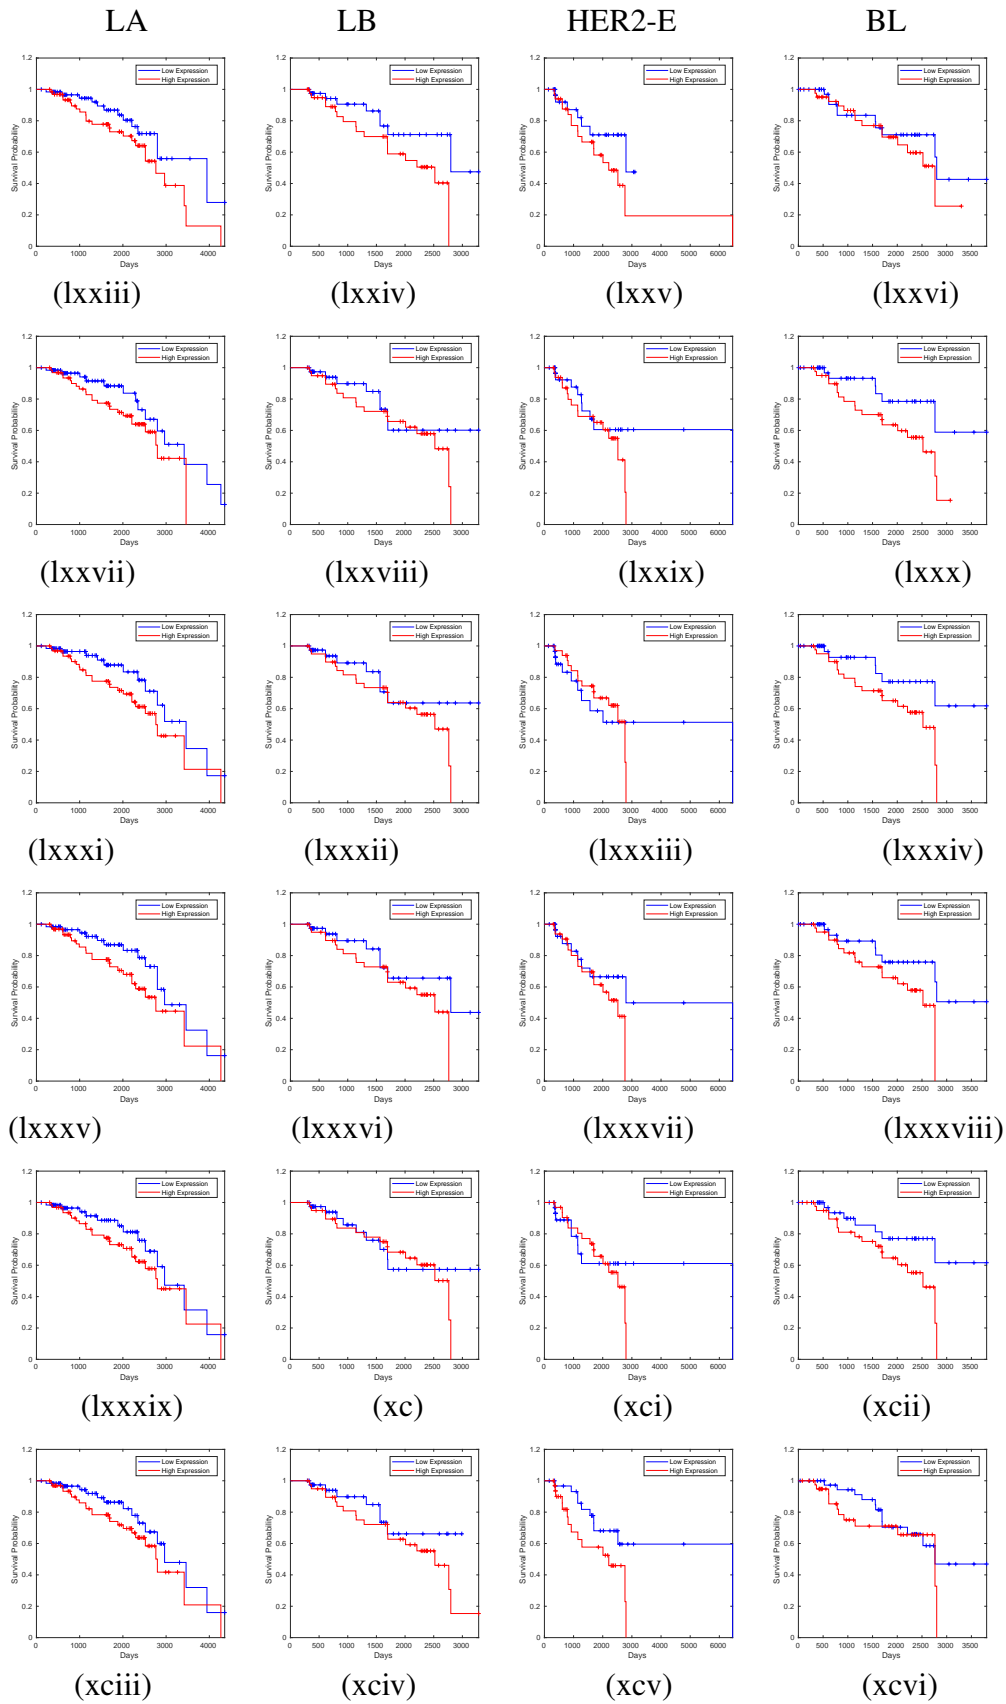

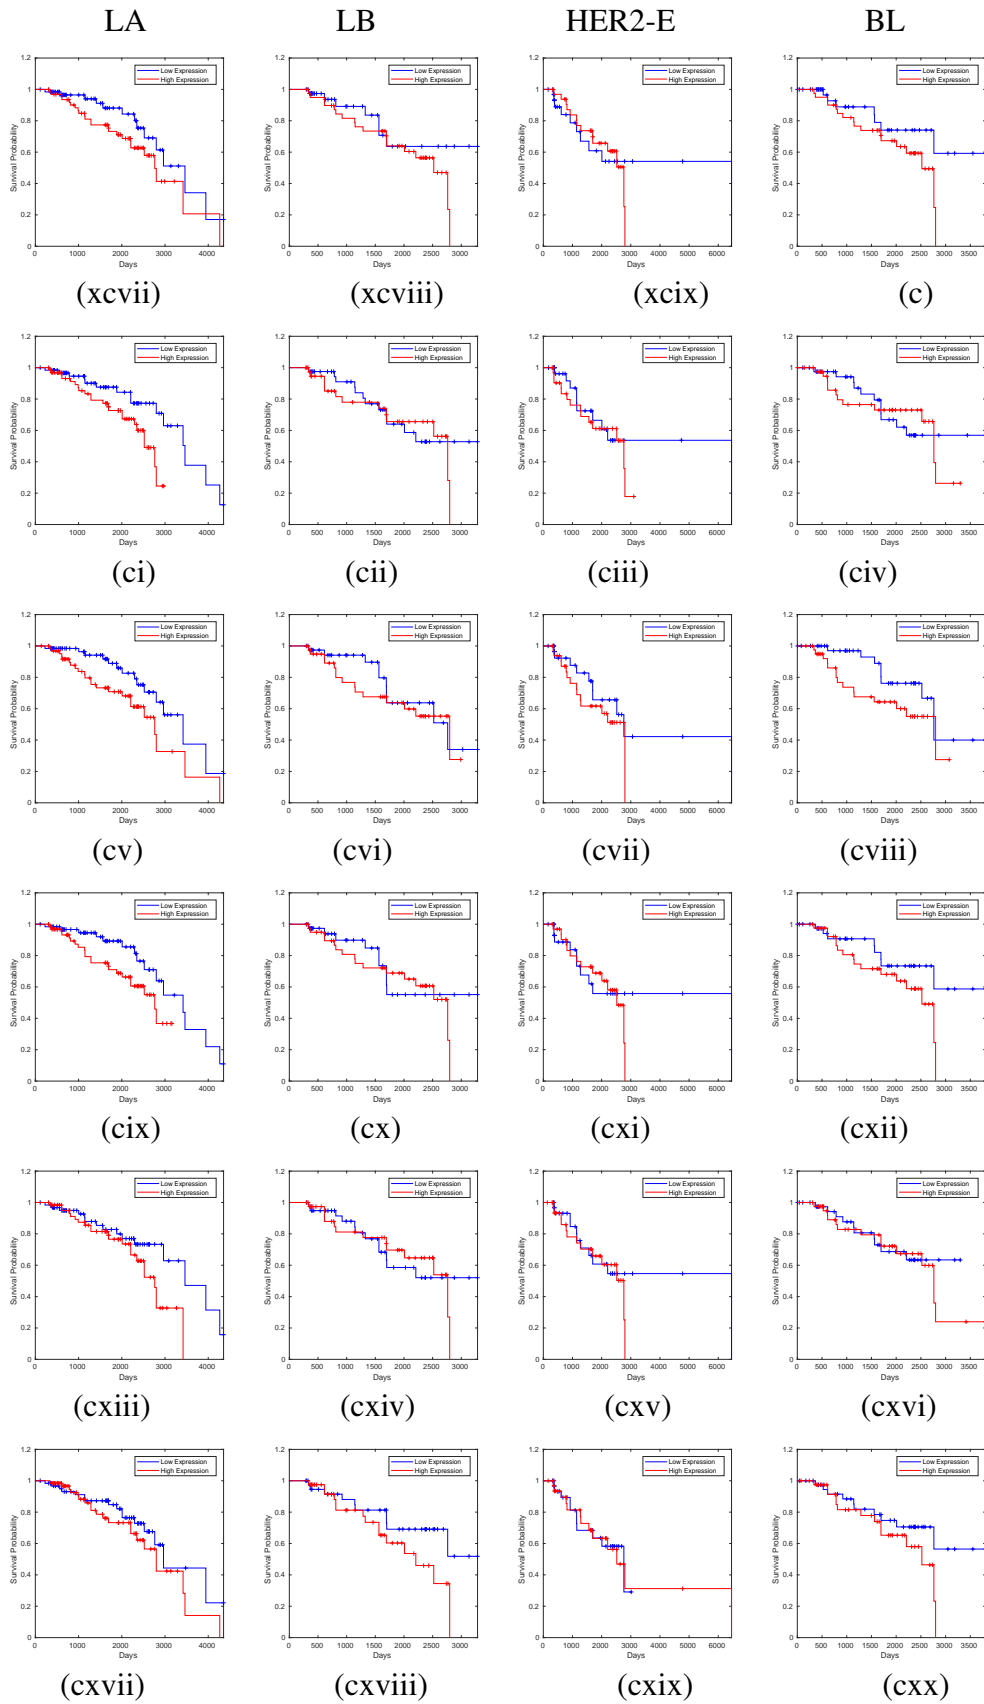

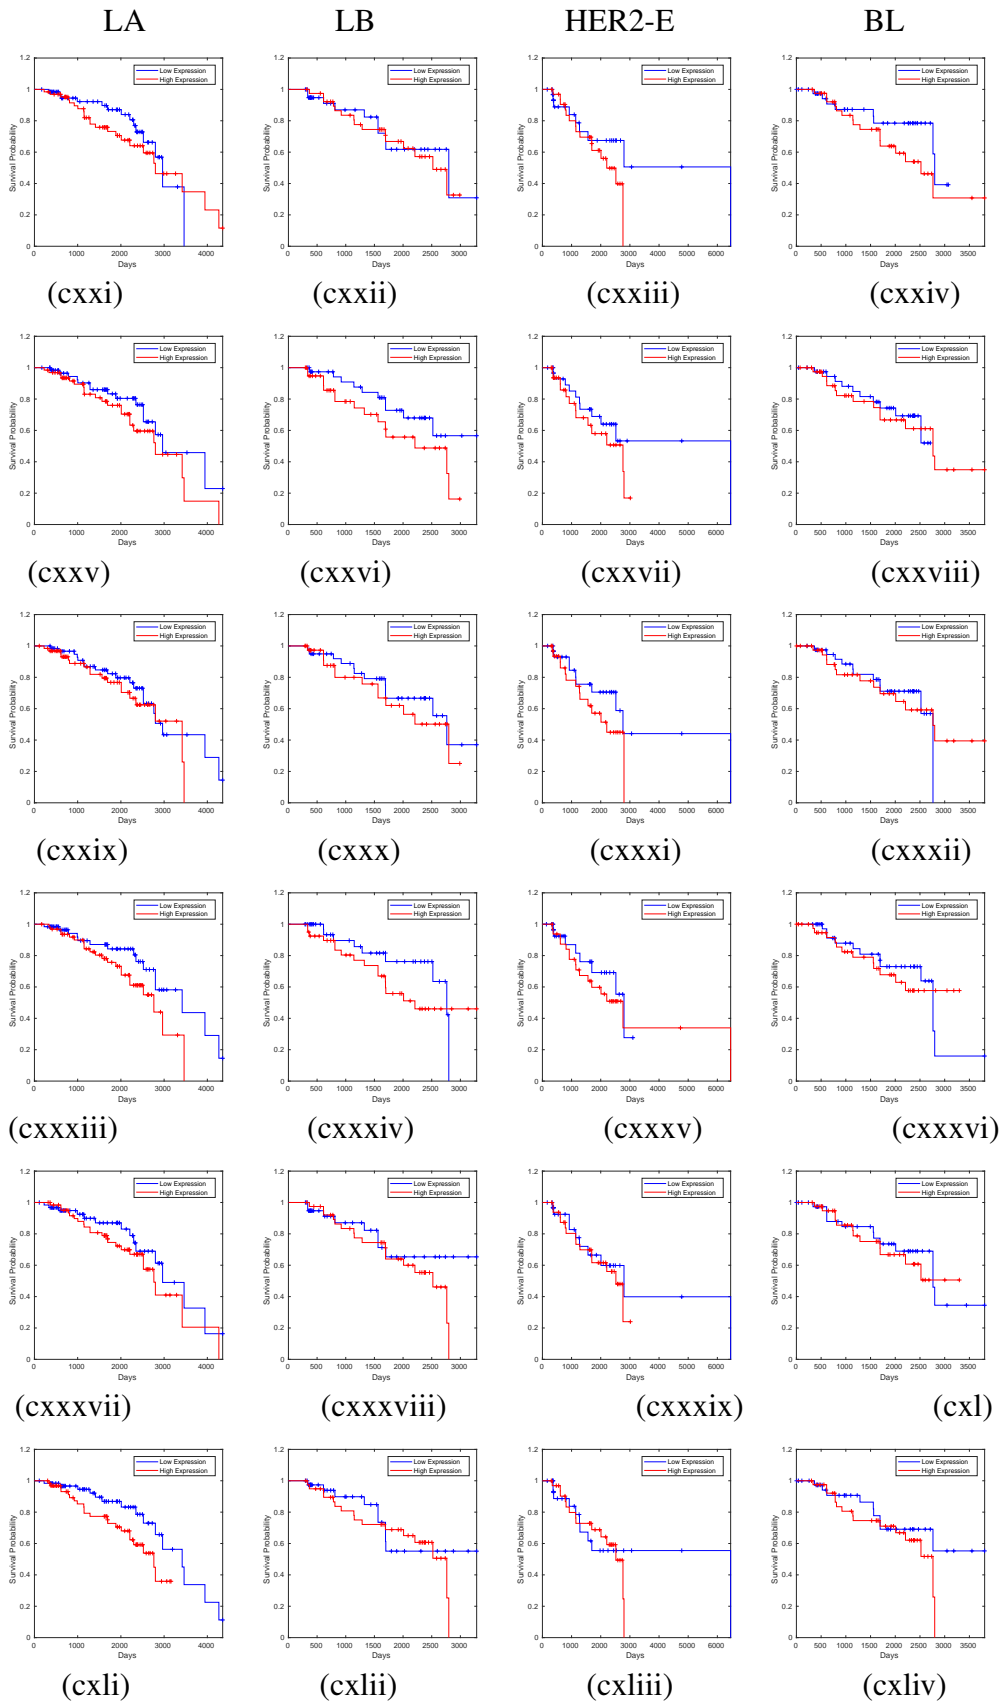



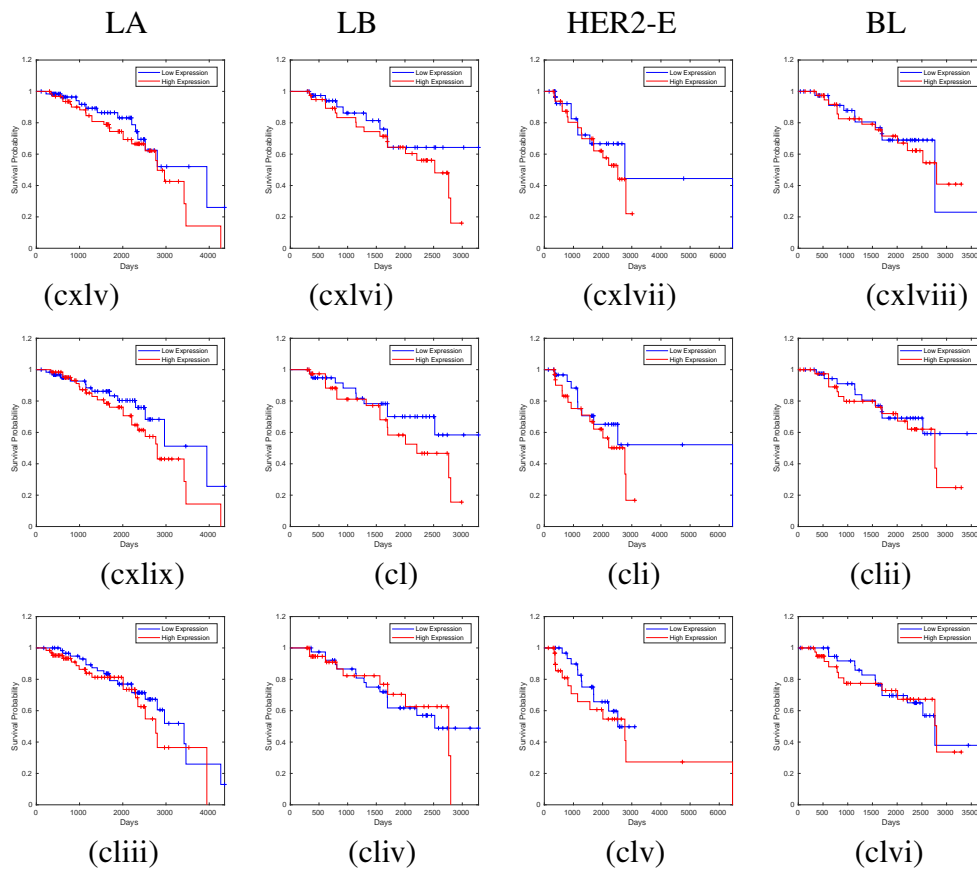

Figure S1: Survival plots for 4-star miRNAs in LA, LB, HER2-E and BL as (i)-(iv):hsa-miR-224-5p, (v)-(viii):hsa-miR-335-3p, (ix)-(xii):hsa-miR-326, (xiii)-(xvi):hsa-miR-10a-5p, (xvii)-(xx):hsa-miR-217, (xxi)-(xxiv):hsa-miR-10b-3p, (xxv)-(xxviii):hsa-miR-378a-5p, (xxix)-(xxxii):hsa-miR-193a-5p, (xxxiii)-(xxxvi):hsa-miR-664a-3p, (xxxvii)-(xl):hsa-miR-30c-2-3p, (xli)-(xliv):hsa-miR-511-5p, (xlv)-(xlviii):hsa-miR-143-3p, (xlix)-(lii):hsa-miR-10b-5p, (liii)-(lvi):hsa-miR-22-3p, (lvii)-(lx):hsa-miR-140-3p, (lxi)-(lxiv):hsa-miR-338-3p, (lxv)-(lxviii):hsa-miR-451a, (lxix)-(lxxii):hsa-miR-486-5p, (lxxiii)-(lxxvi):hsa-miR-28-3p, (lxxvii)-(lxxx):hsa-miR-139-5p, (lxxxii)-(lxxxiv):hsa-miR-125b-2-3p, (lxxxv)-(lxxxviii):hsa-miR-100-5p, (lxxxix)-(xcii):hsa-miR-195-5p, (xciii)-(xcvi):hsa-miR-584-5p, (xcvii)-(c):hsa-let-7c-5p, (ci)-(civ):hsa-miR-574-3p, (cv)-(cviii):hsa-miR-144-5p, (cix)-(cxii):hsa-miR-145-5p, (cxiii)-(cxvi):hsa-let-7e-3p, (cxvii)-(cxx):hsa-miR-24-1-5p, (cxxi)-(cxxiv):hsa-miR-30a-3p, (cxxv)-(cxxviii):hsa-miR-362-5p, (cxxix)-(cxxxii):hsa-miR-339-5p, (cxxxiii)-(cxxxvi):hsa-miR-361-3p, (cxxxvii)-(cxl):hsa-miR-30e-3p, (cxli)-(cxliv):hsa-miR-145-3, (cxlv)-(cxlviii):hsa-miR-29a-3p, (cxlix)-(clii):hsa-miR-34a-5p, (cliii)-(clvi):hsa-miR-193b-5p, where blue line indicates low expression group and red line indicates high expression group

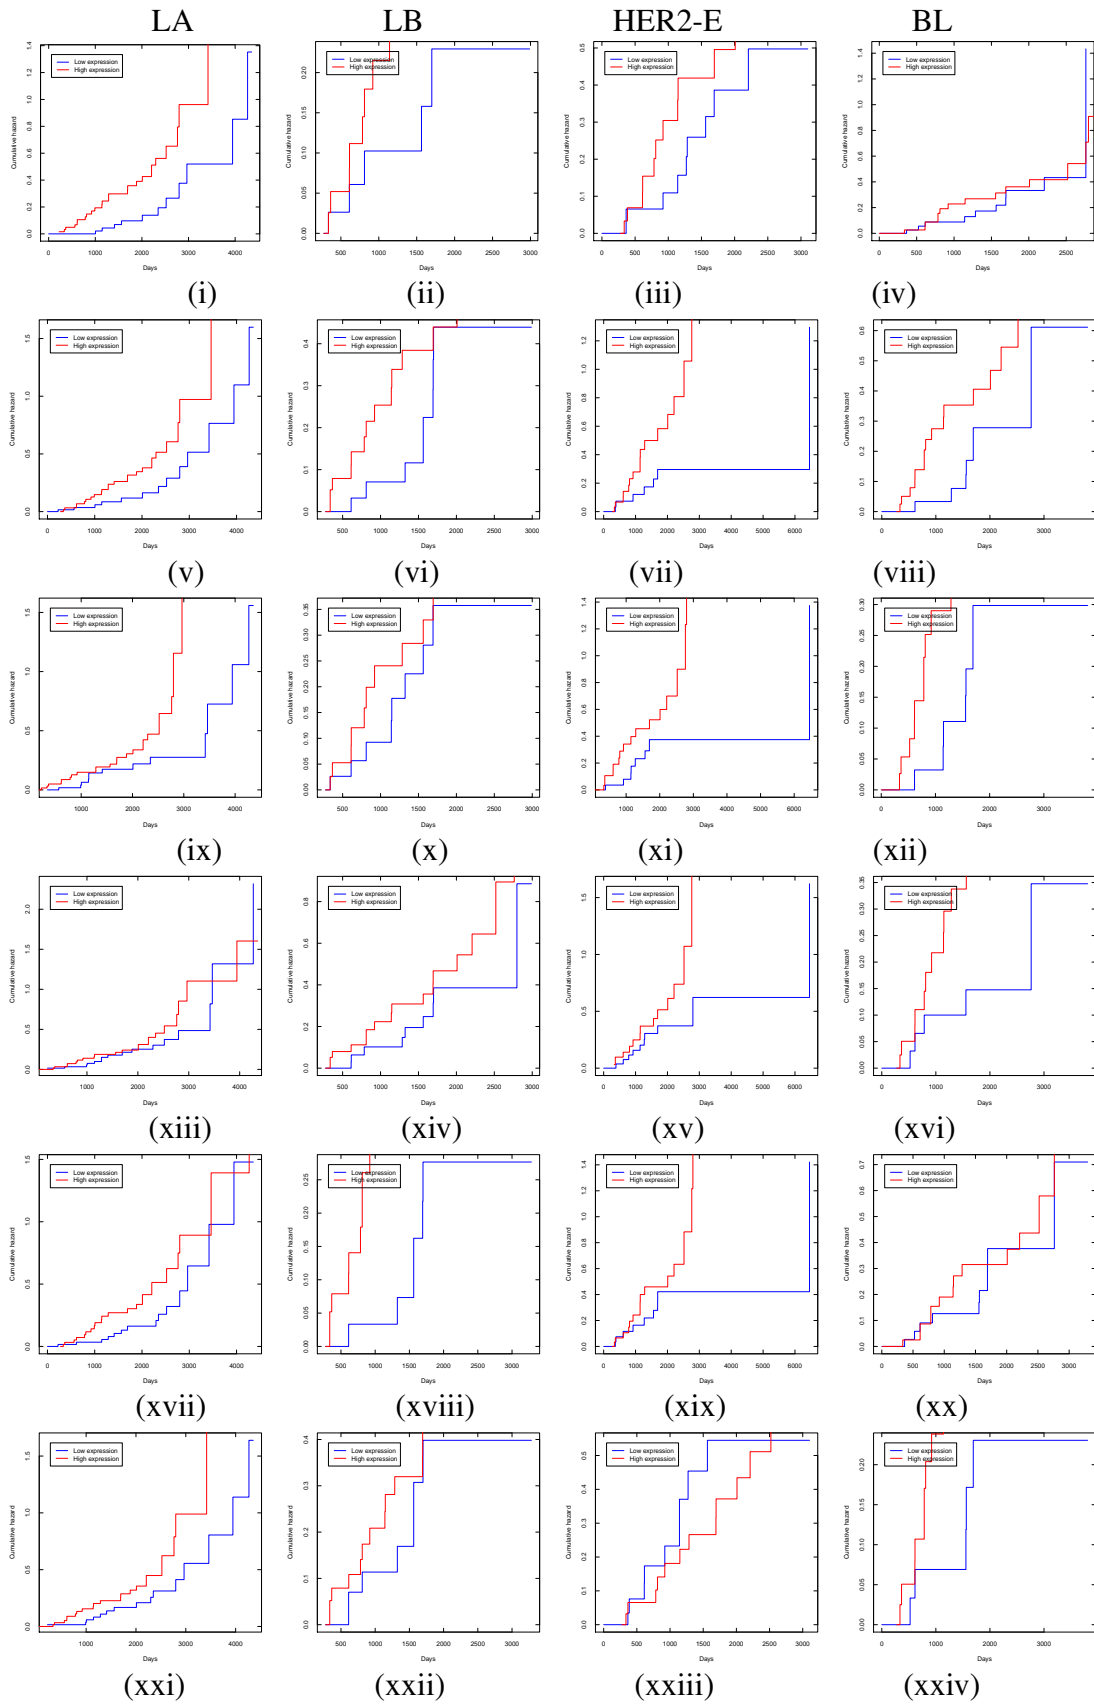

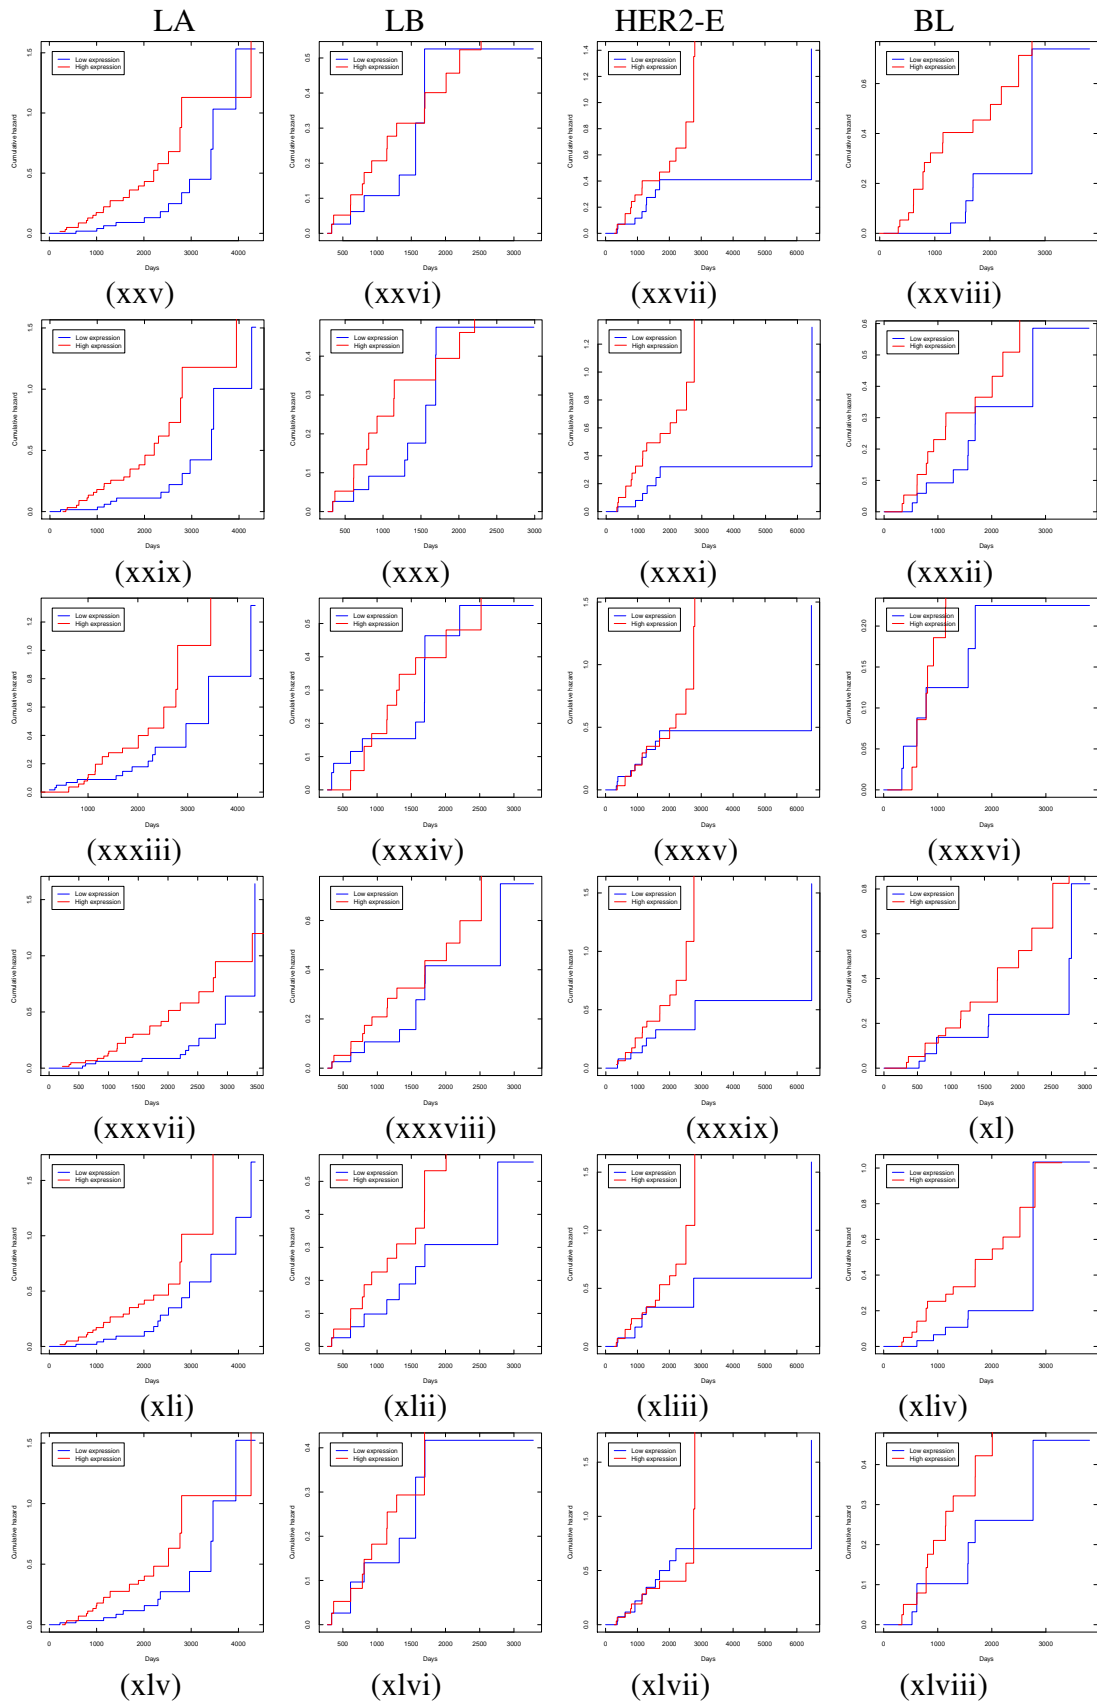

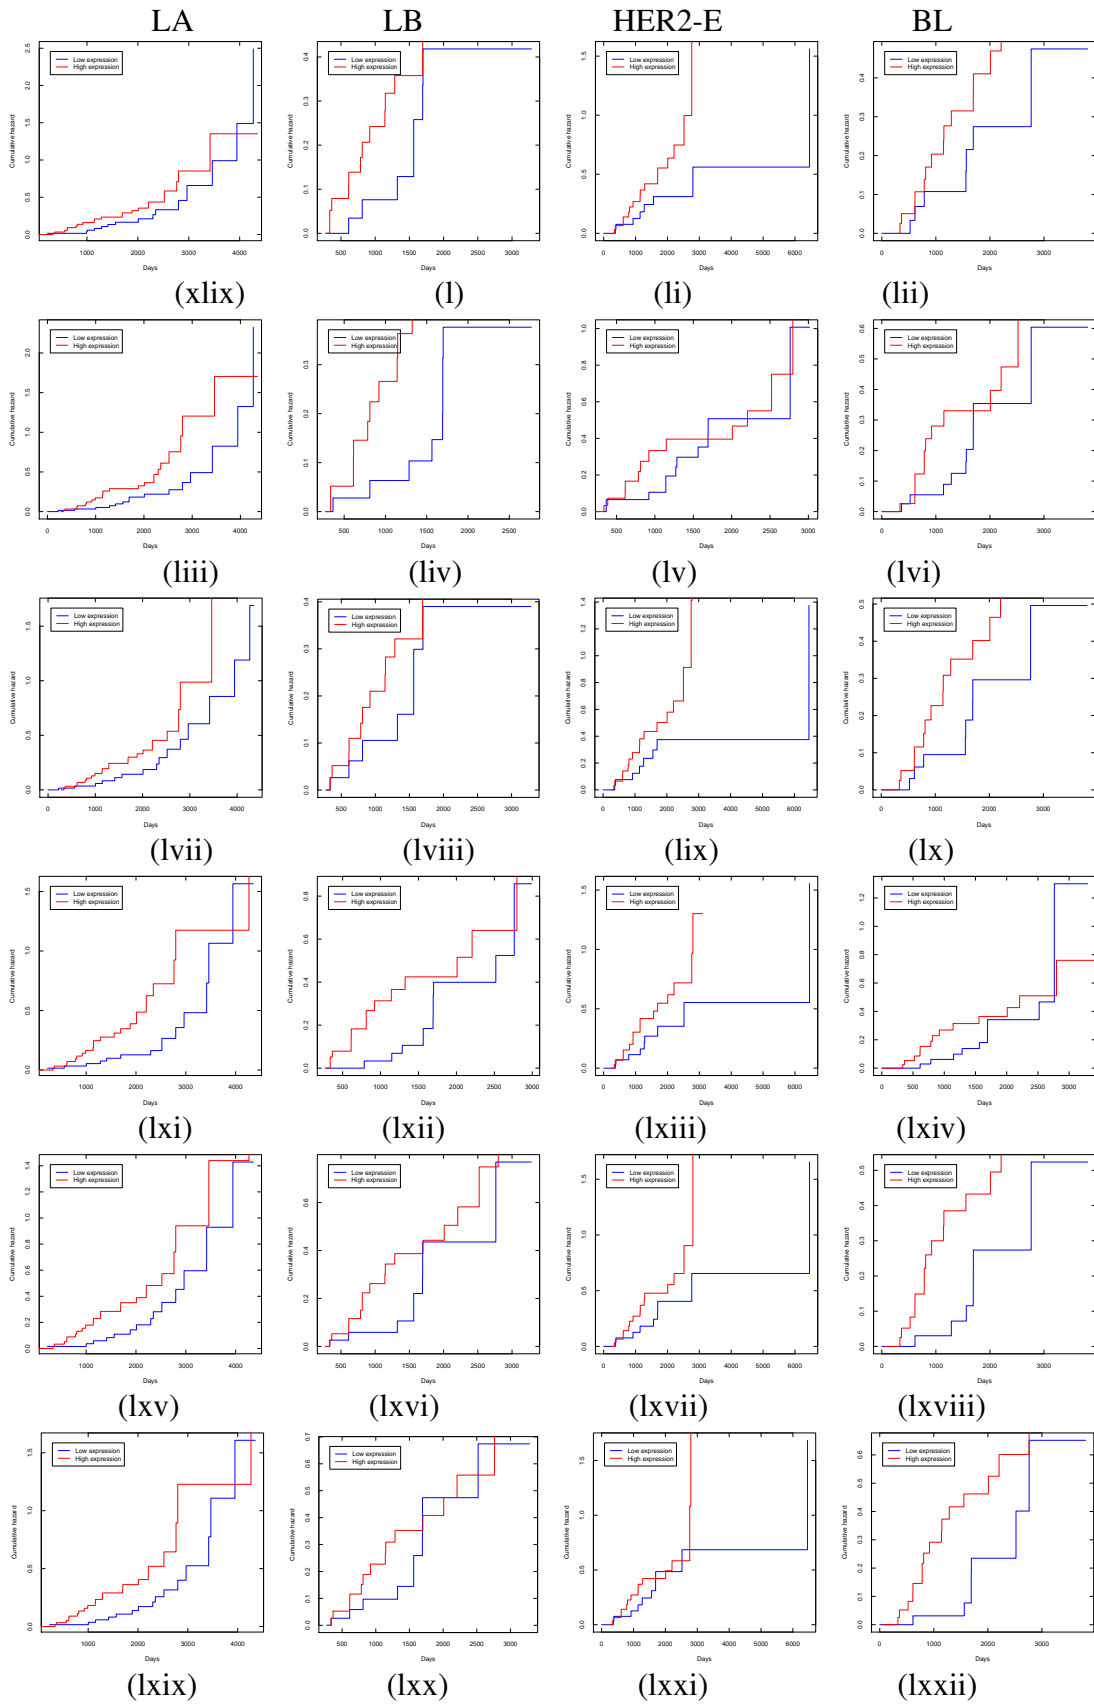

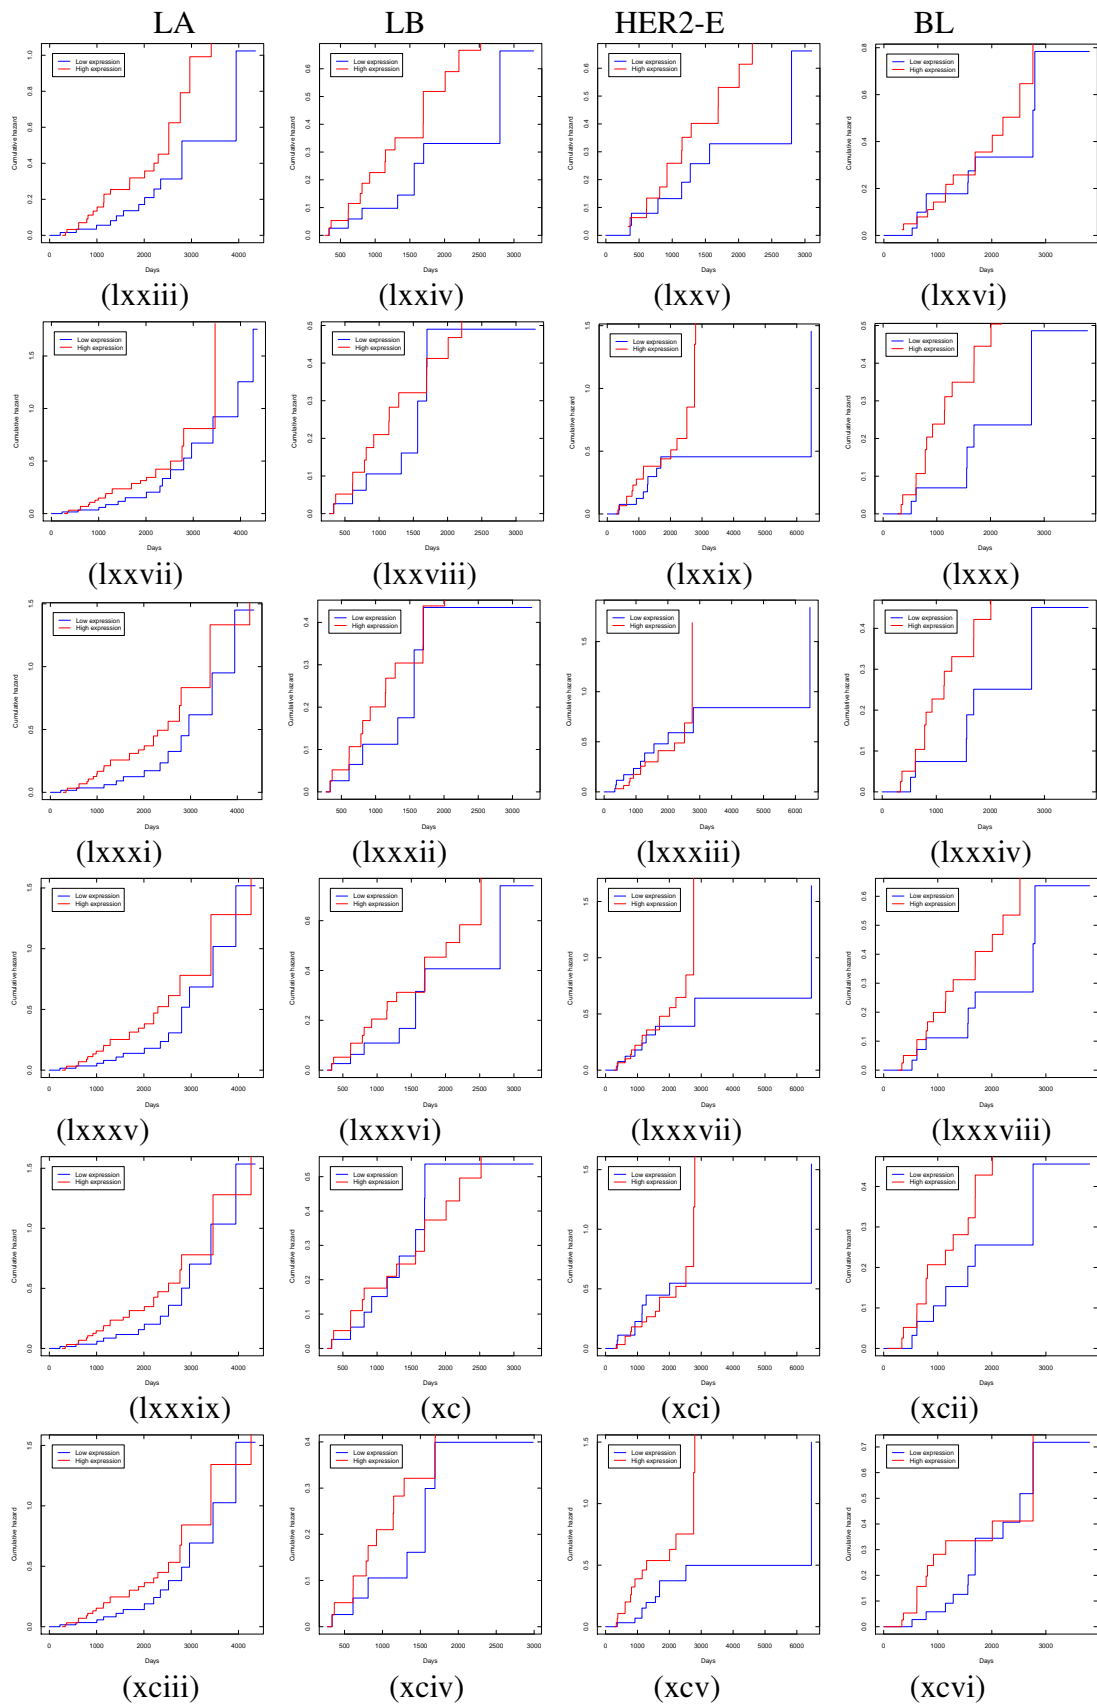

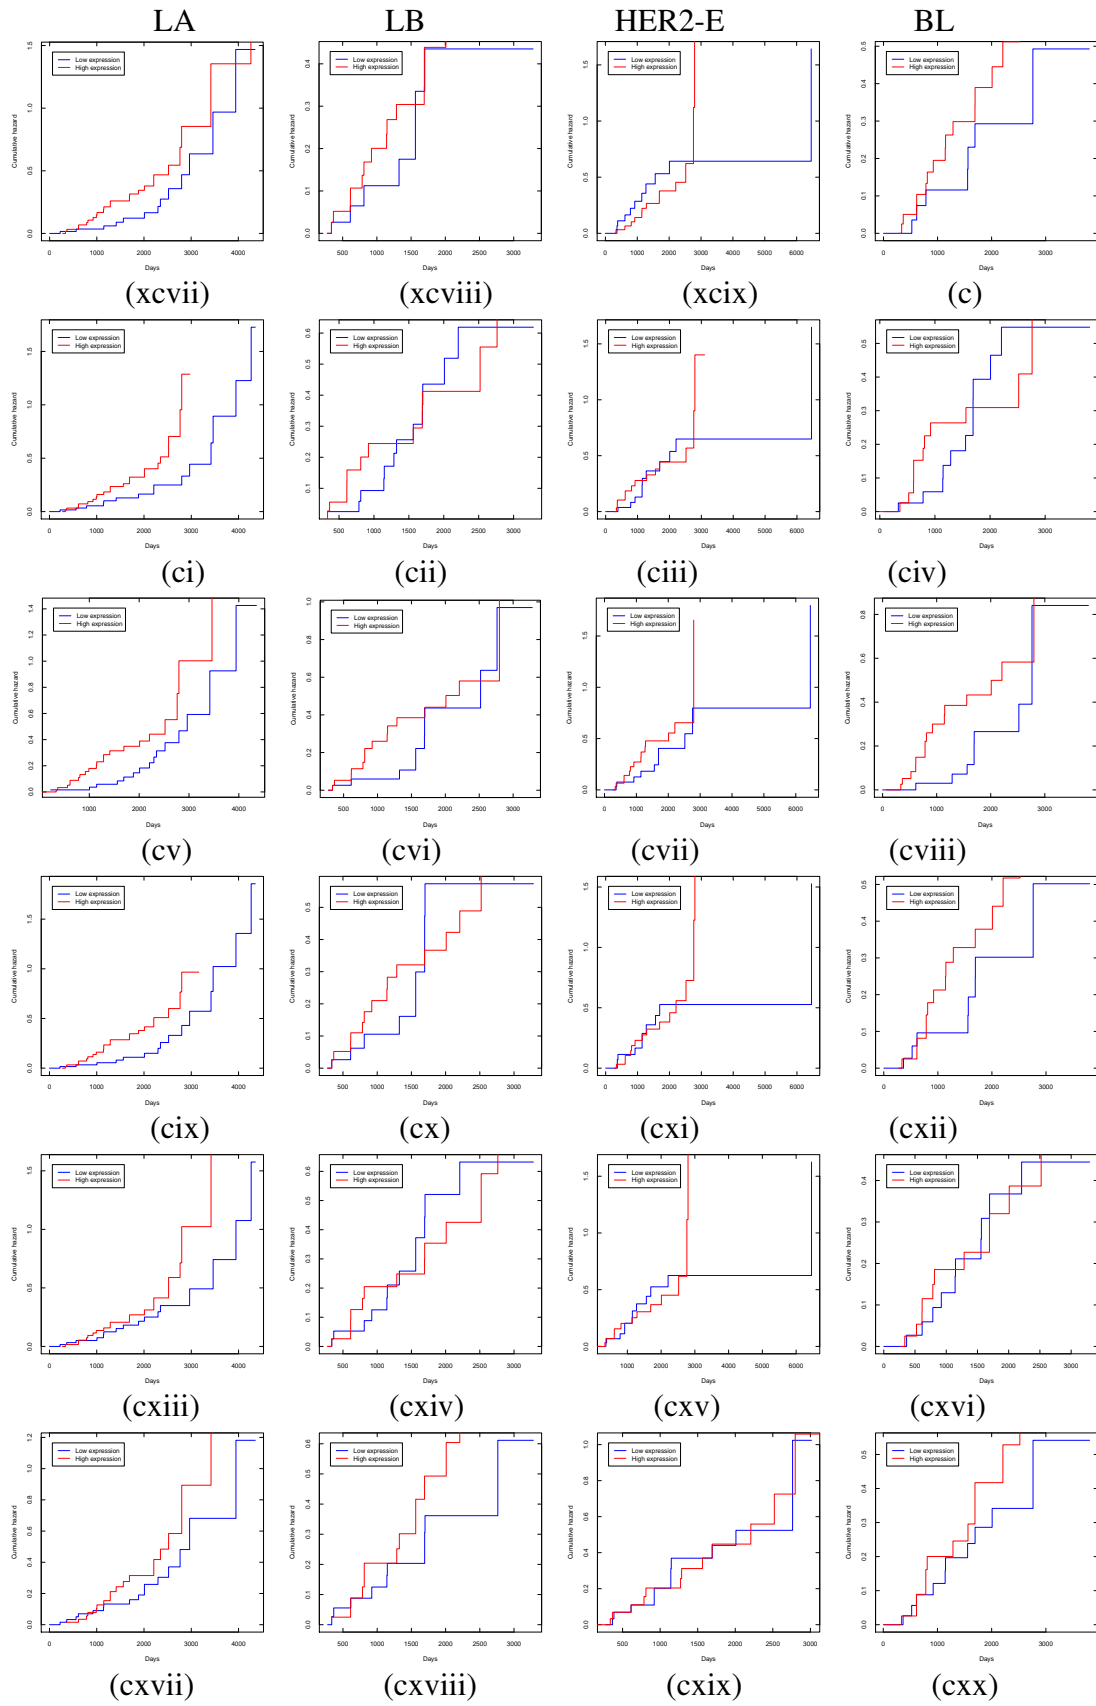

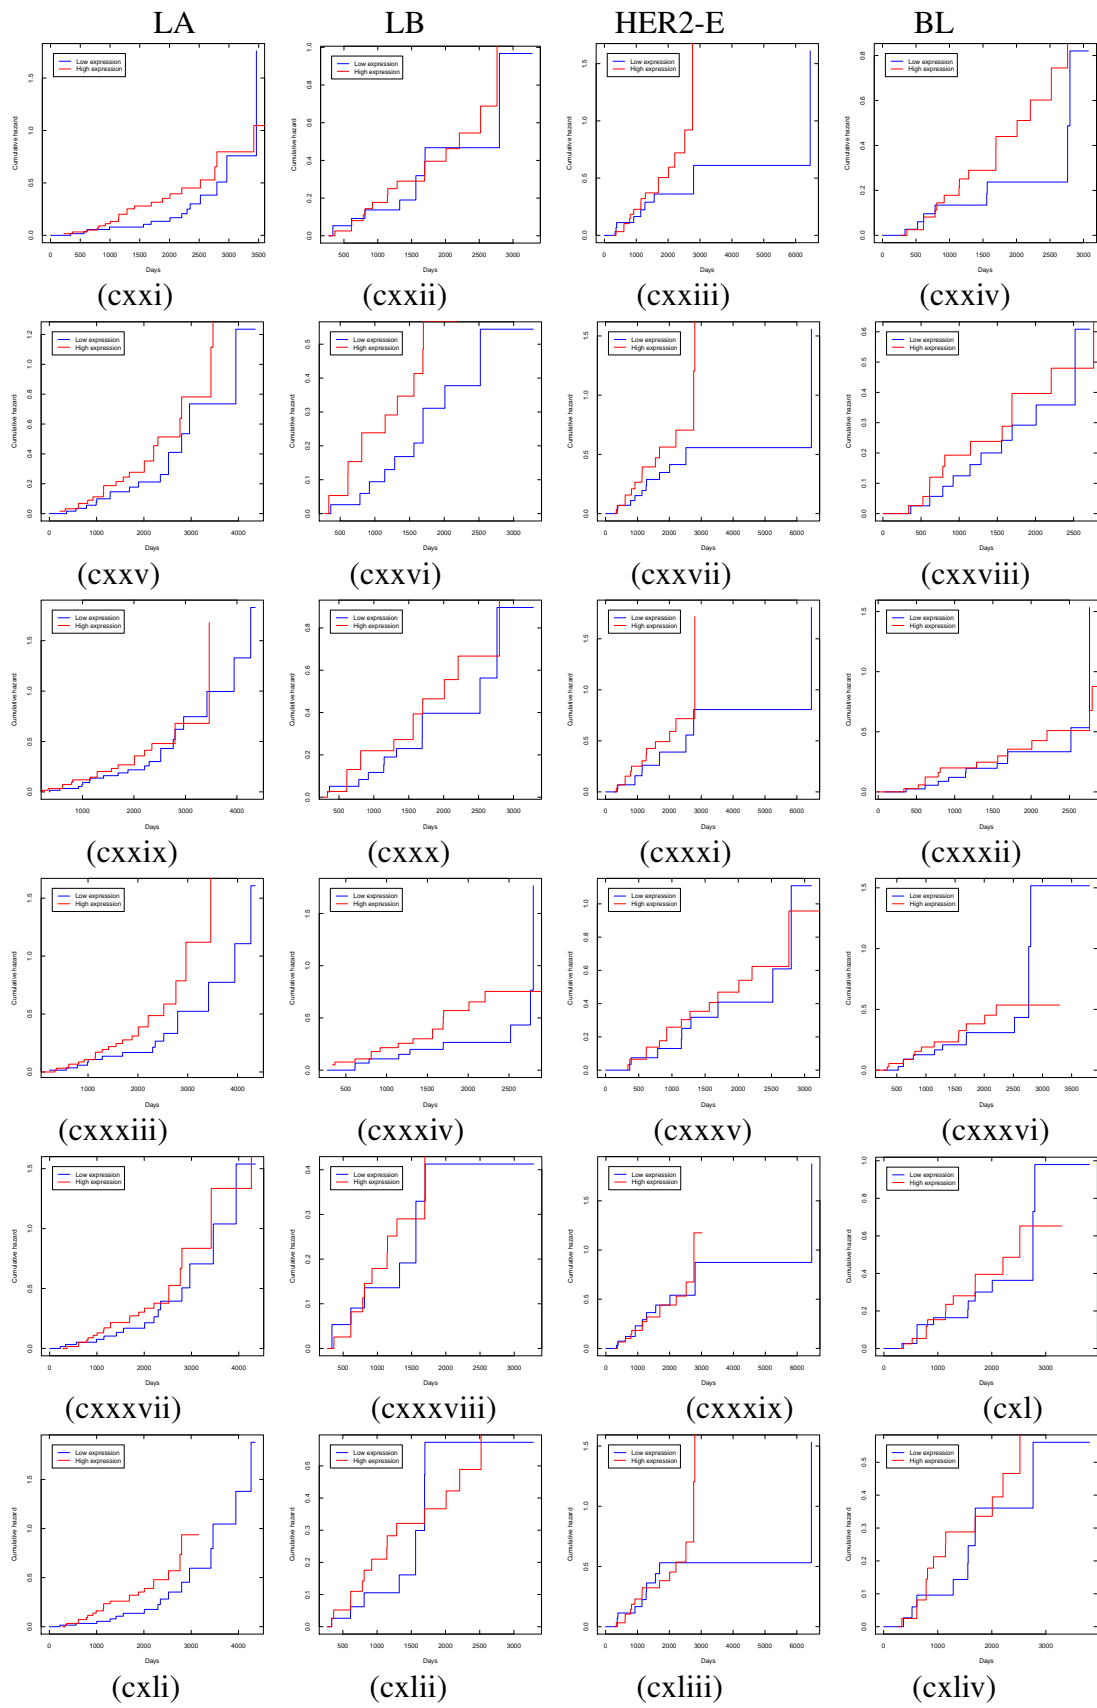

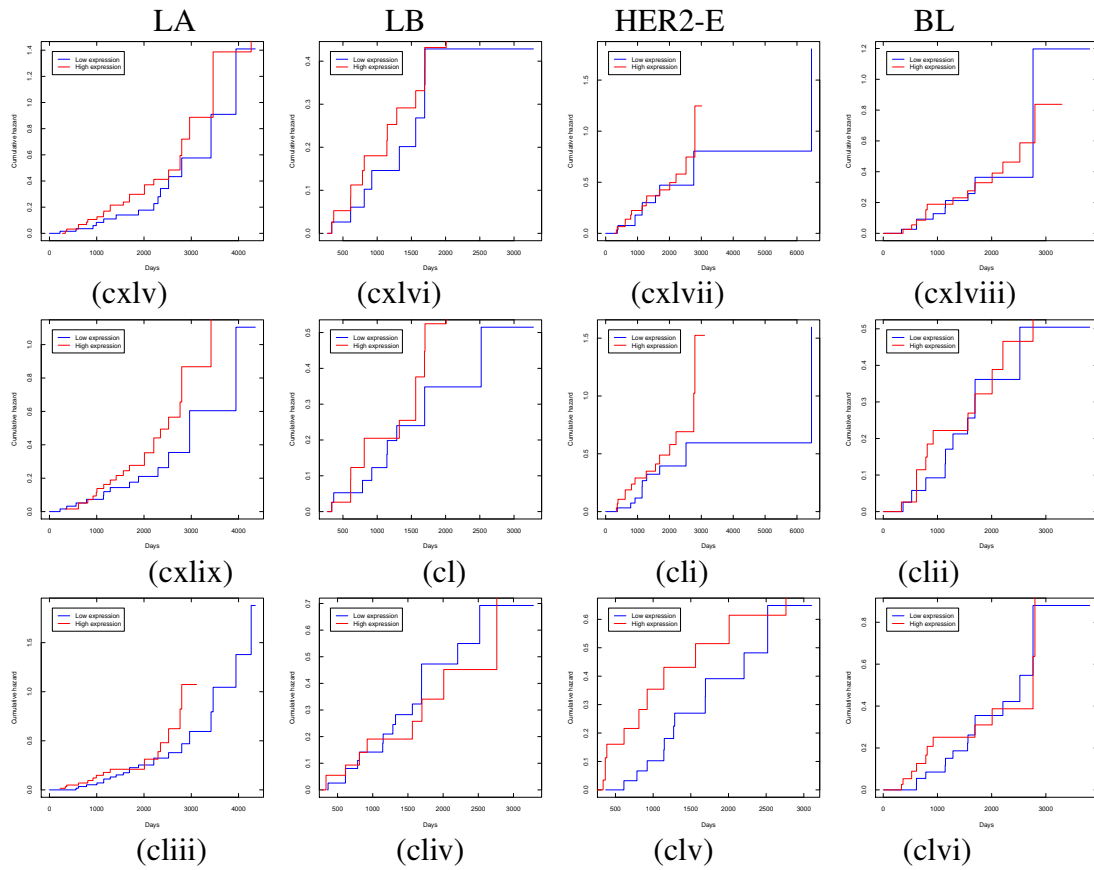

Figure S2: Cumulative hazard plots, using Nelson-Aalen estimator for 4-star miRNAs in LA, LB, HER2-E and BL as (i)-(iv):hsa-miR-224-5p, (v)-(viii):hsa-miR-335-3p, (ix)-(xii):hsa-miR-326, (xiii)-(xvi):hsa-miR-10a-5p, (xvii)-(xx):hsa-miR-217, (xxi)-(xxiv):hsa-miR-10b-3p, (xxv)-(xxviii):hsa-miR-378a-5p, (xxix)-(xxxii):hsa-miR-193a-5p, (xxxiii)-(xxxvi):hsa-miR-664a-3p, (xxxvii)-(xl):hsa-miR-30c-2-3p, (xli)-(xliv):hsa-miR-511-5p, (xlv)-(xlviii):hsa-miR-143-3p, (xlix)-(lii):hsa-miR-10b-5p, (liii)-(lvi):hsa-miR-22-3p, (lvii)-(lx):hsa-miR-140-3p, (lxi)-(lxiv):hsa-miR-338-3p, (lxv)-(lxviii):hsa-miR-451a, (lxix)-(lxxii):hsa-miR-486-5p, (lxxiii)-(lxxvi):hsa-miR-28-3p, (lxxvii)-(lxxx):hsa-miR-139-5p, (lxxxii)-(lxxxiv):hsa-miR-125b-2-3p, (lxxxv)-(lxxxviii):hsa-miR-100-5p, (lxxxix)-(xcii):hsa-miR-195-5p, (xciii)-(xcvi):hsa-miR-584-5p, (xcvii)-(c):hsa-let-7c-5p, (ci)-(civ):hsa-miR-574-3p, (cv)-(cviii):hsa-miR-144-5p, (cix)-(cxii):hsa-miR-145-5p, (cxiii)-(cxvi):hsa-let-7e-3p, (cxvii)-(cxx):hsa-miR-24-1-5p, (cxxi)-(cxxiv):hsa-miR-30a-3p, (cxxv)-(cxxviii):hsa-miR-362-5p, (cxxix)-(cxxxii):hsa-miR-339-5p, (cxxxiii)-(cxxxvi):hsa-miR-361-3p, (cxxxvii)-(cxl):hsa-miR-30e-3p, (cxli)-(cxliv):hsa-miR-145-3, (cxlv)-(cxlviii):hsa-miR-29a-3p, (cxlix)-(clii):hsa-miR-34a-5p, (cliii)-(clvi):hsa-miR-193b-5p, where blue line indicates low expression group and red line indicates high expression group



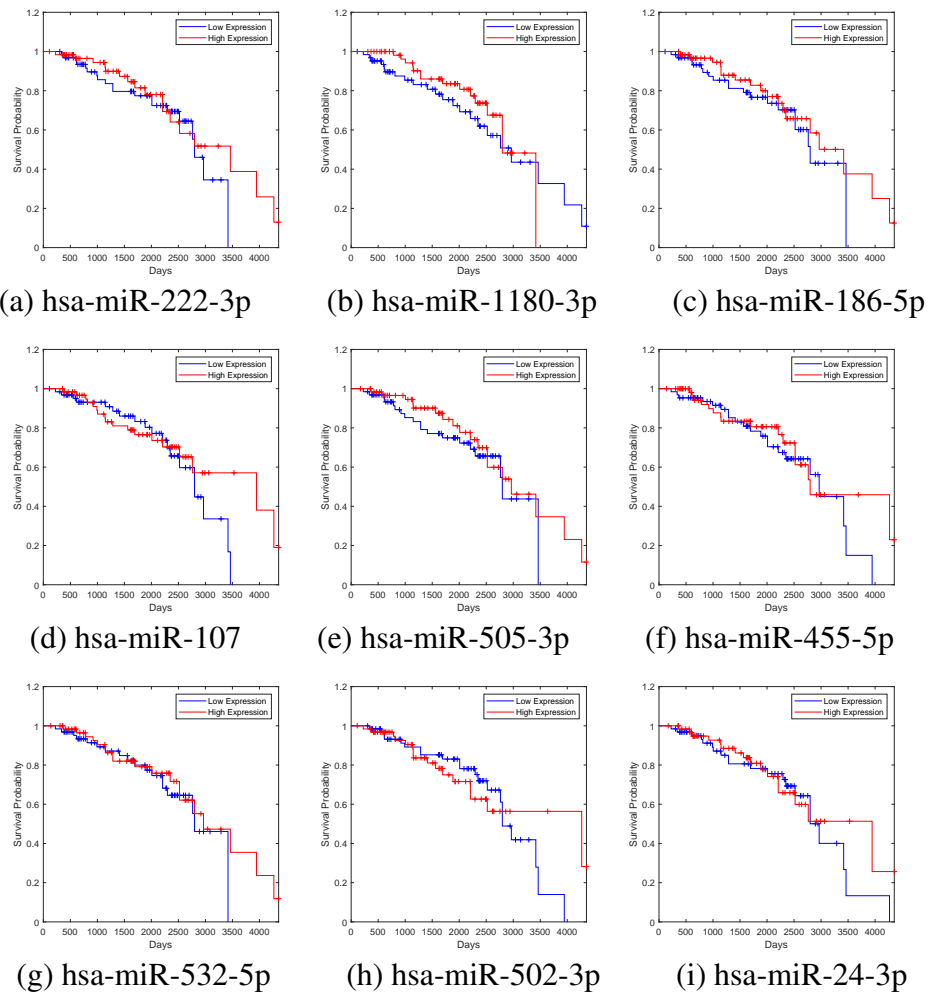

Figure S3: Survival plots for 1-star LA miRNAs where blue line indicates low expression group and red line indicates high expression group

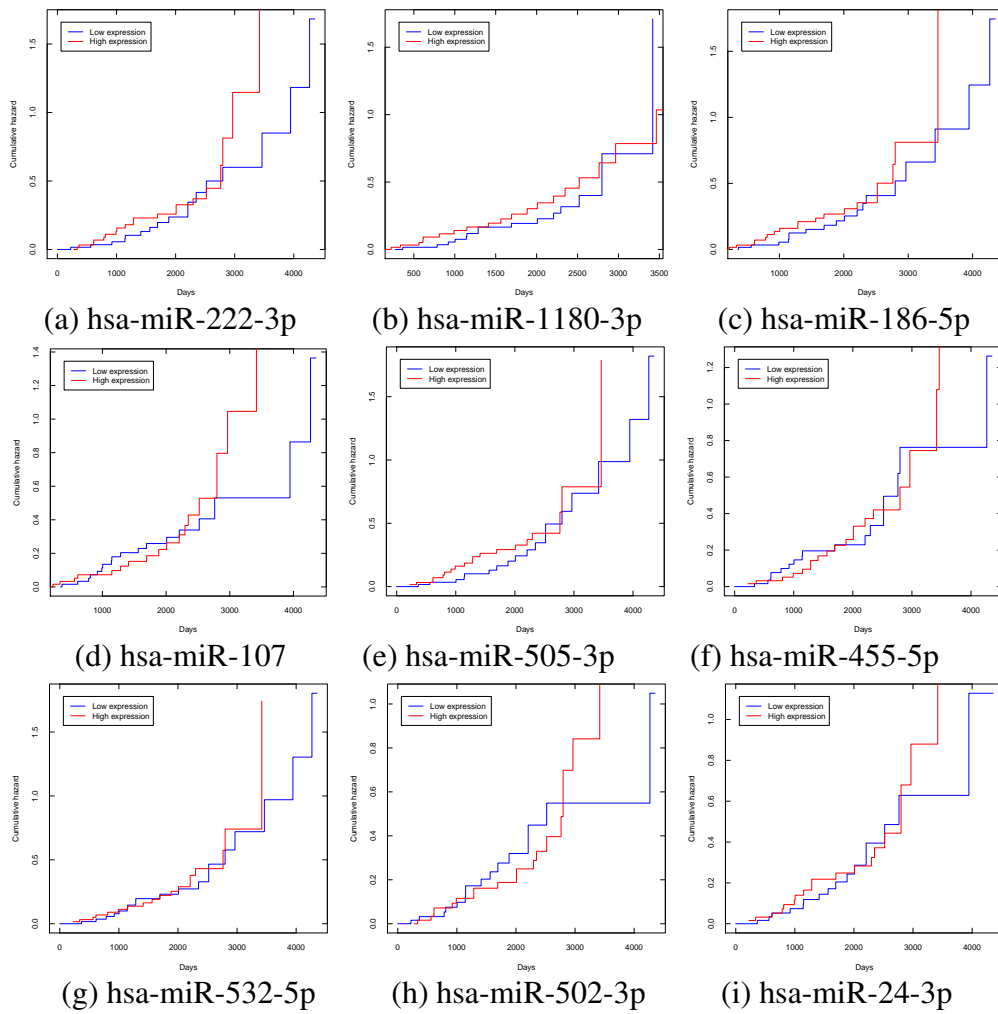

Figure S4: Cumulative hazard plots, using Nelson-Aalen estimator for 1-star LA miRNAs where blue line indicates low expression group and red line indicates high expression group

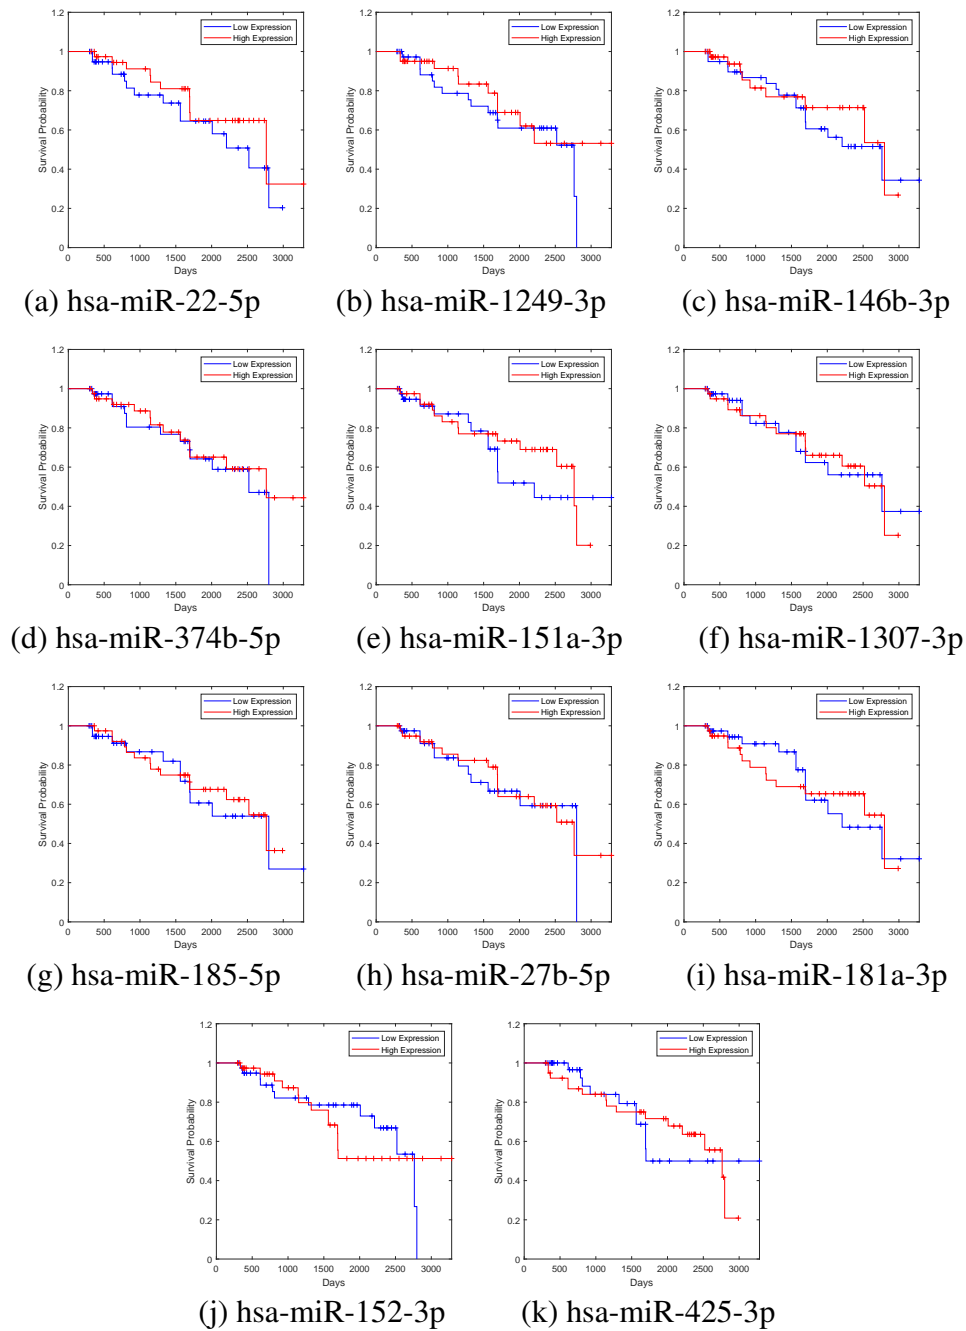

Figure S5: Survival plots for 1-star LB miRNAs where blue line indicates low expression group and red line indicates high expression group

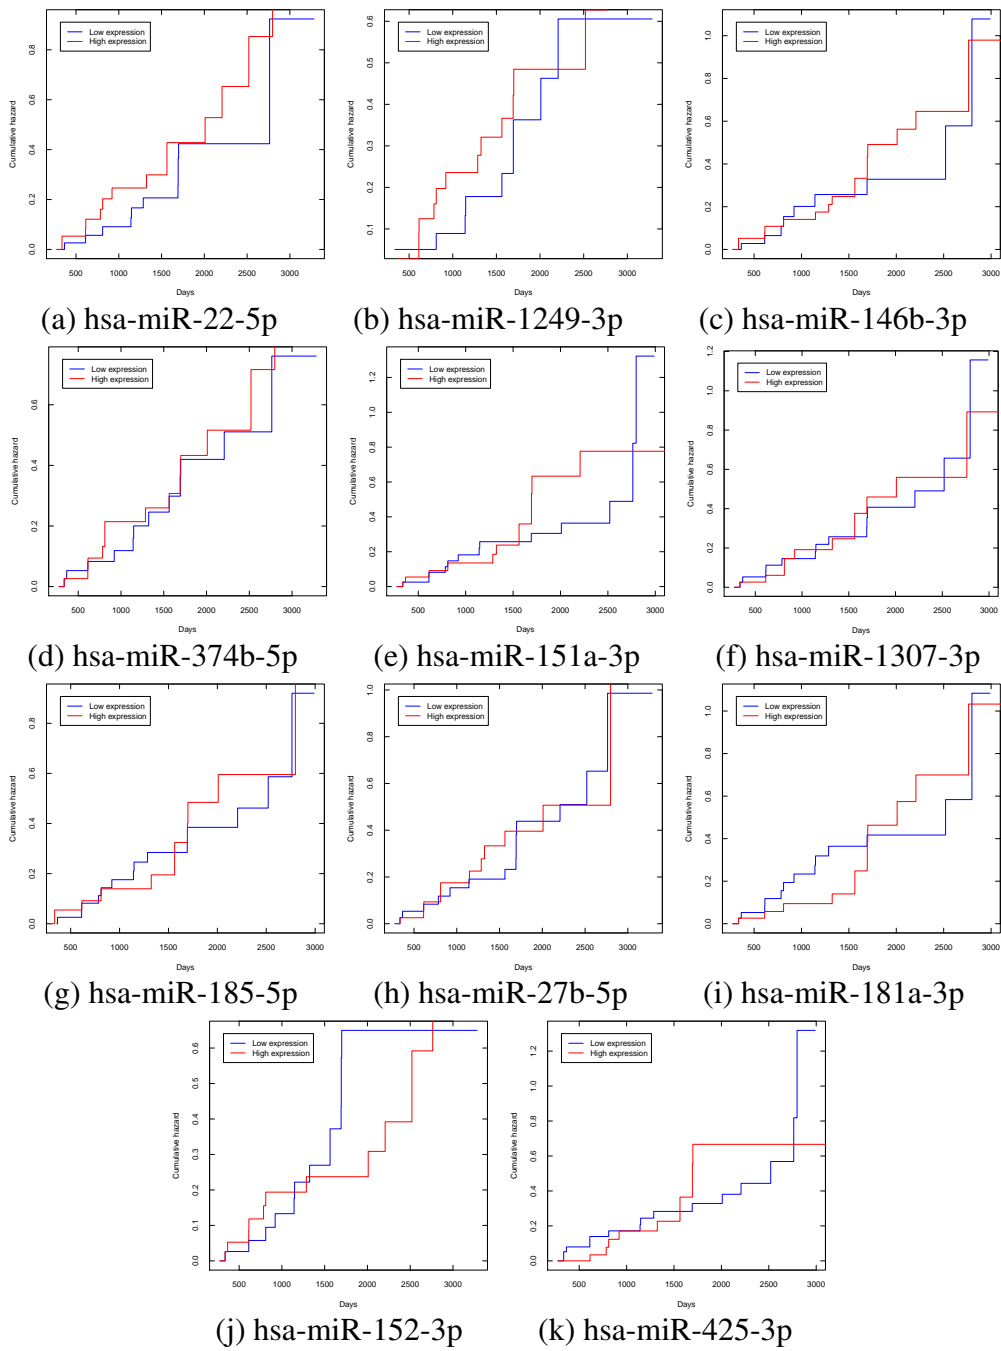

Figure S6: Cumulative hazard plots, using Nelson-Aalen estimator for 1-star LB miRNAs where blue line indicates low expression group and red line indicates high expression group

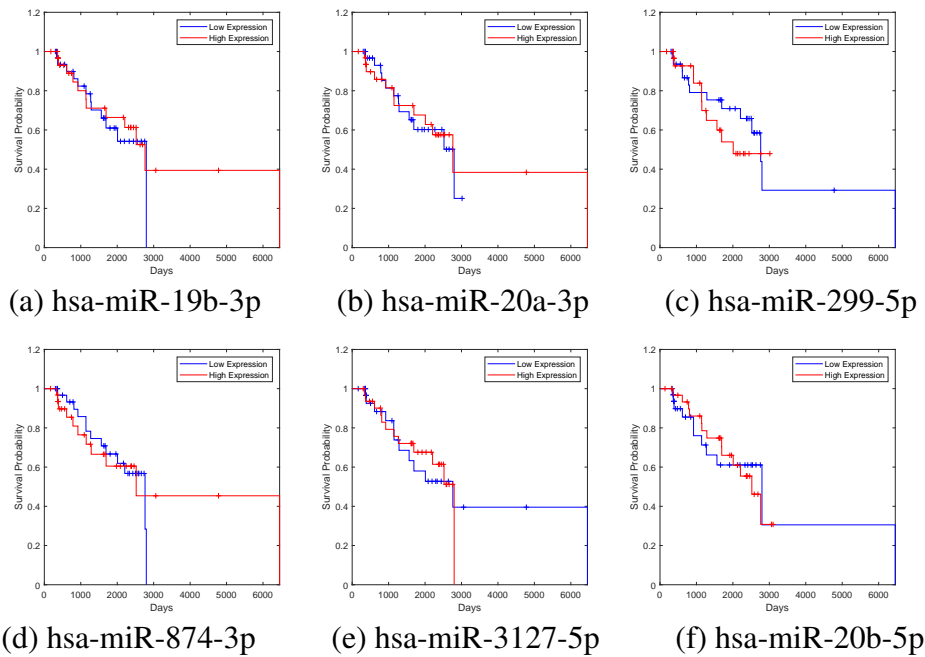

Figure S7: Survival plots for 1-star HER2-E miRNAs where blue line indicates low expression group and red line indicates high expression group

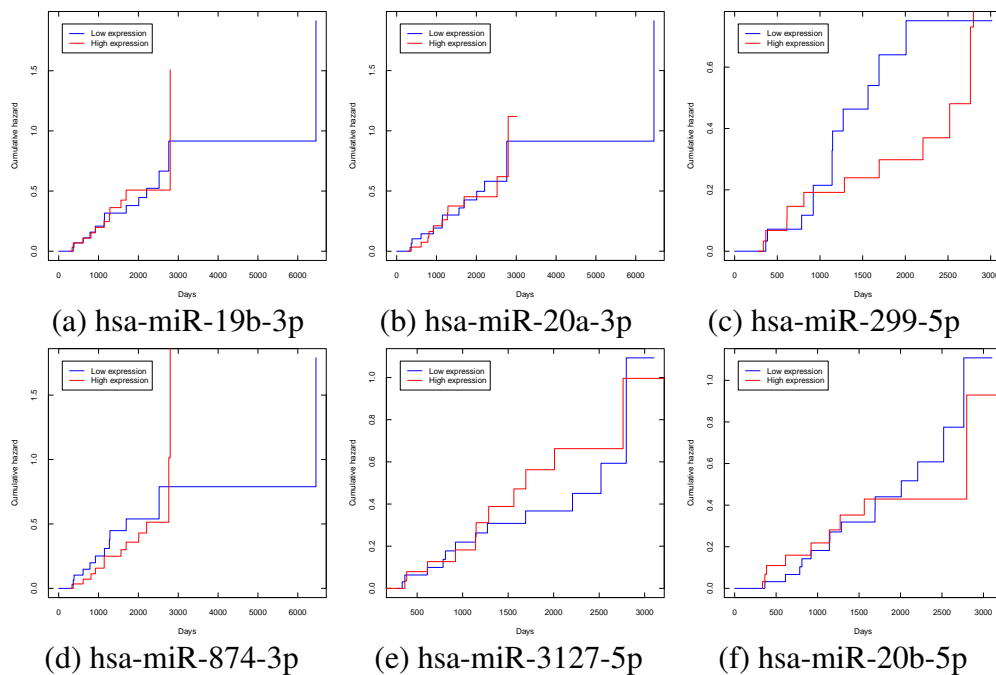

Figure S8: Cumulative hazard plots, using Nelson-Aalen estimator for 1-star HER2-E miRNAs where blue line indicates low expression group and red line indicates high expression group

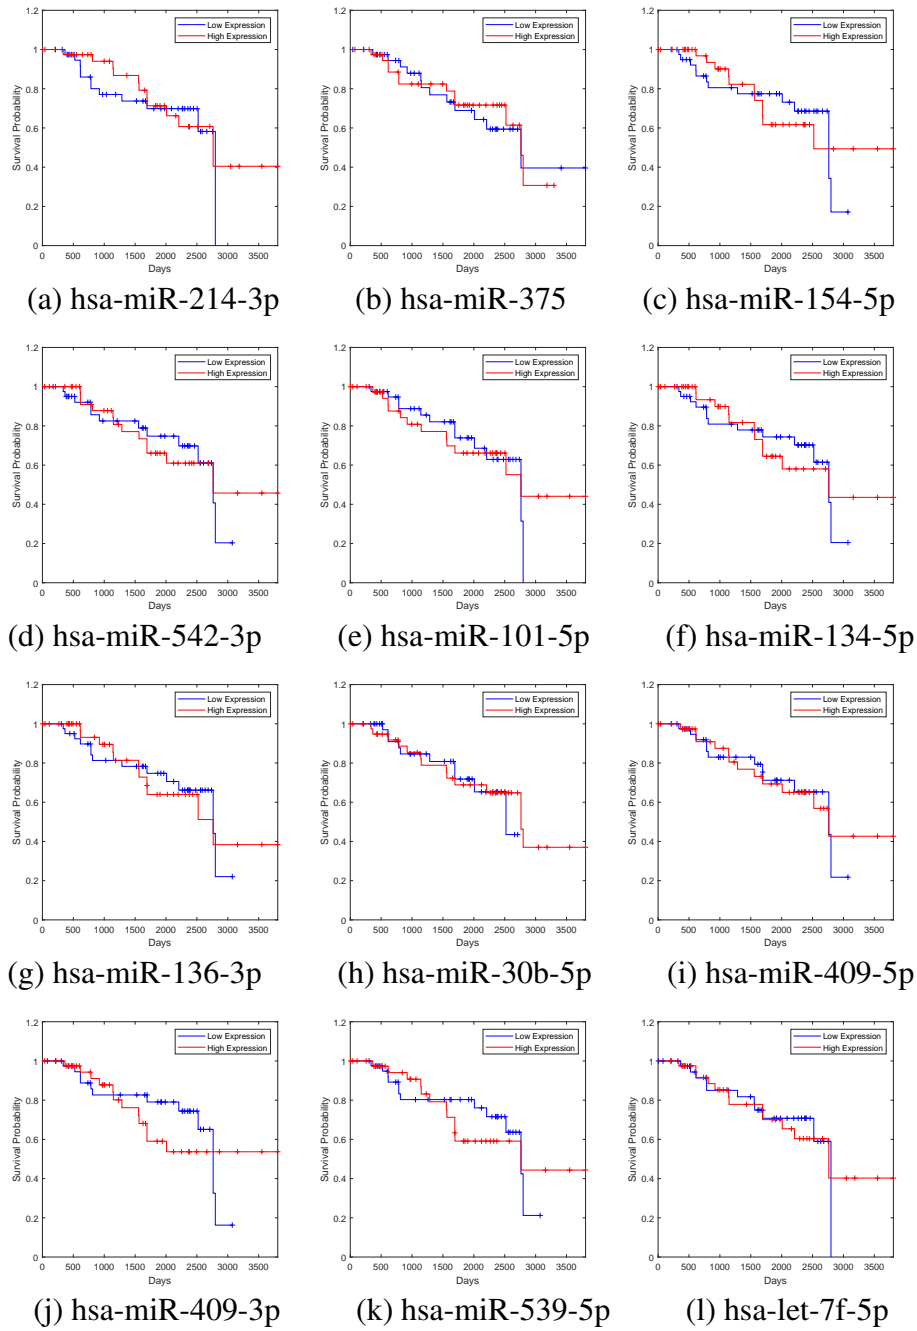

Figure S9: Survival plots for 1-star BL miRNAs where blue line indicates low expression group and red line indicates high expression group

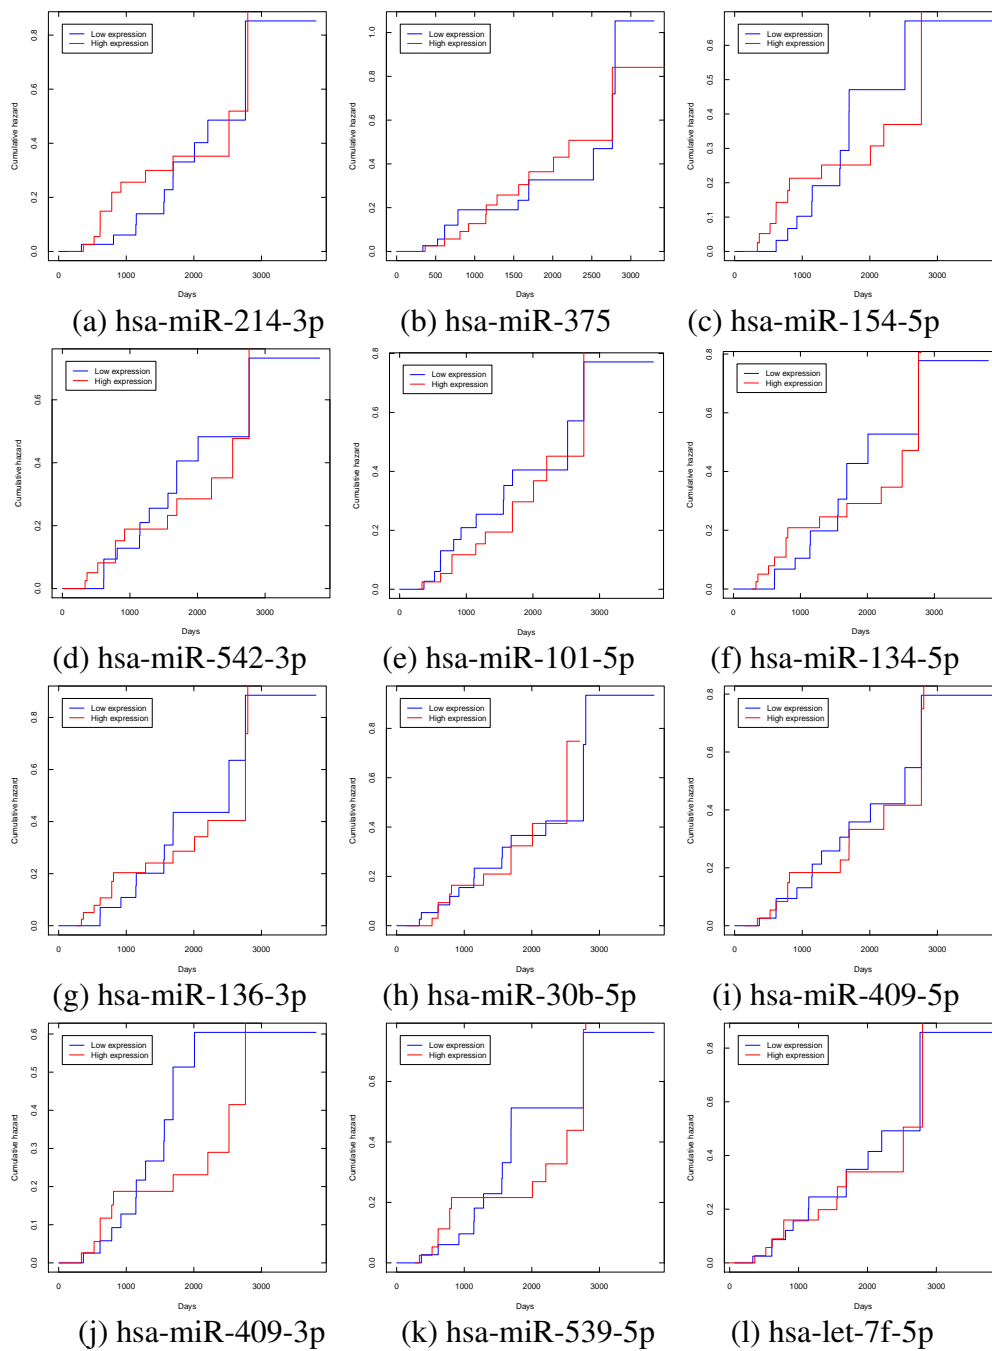

Figure S10: Cumulative hazard plots, using Nelson-Aalen estimator for 1-star BL miRNAs where blue line indicates low expression group and red line indicates high expression group

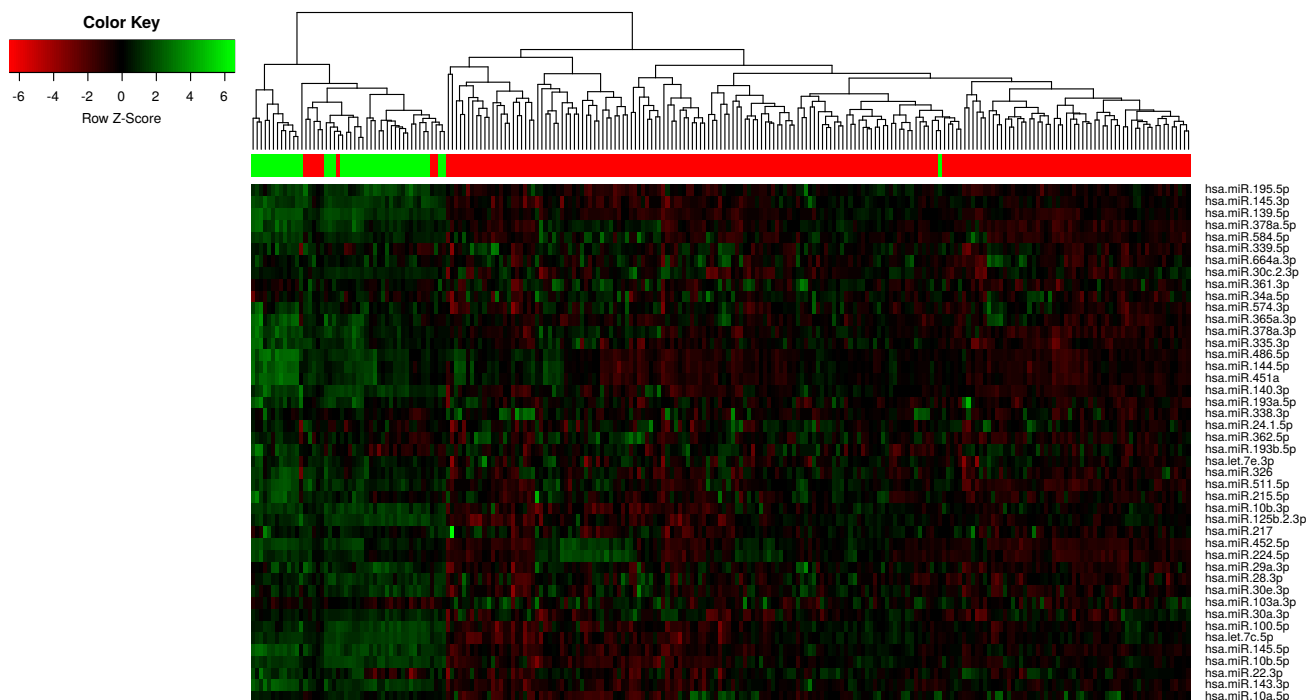

Figure S11: Clustering analysis of the 4-star miRNAs of all patients with control. Color of the top bar represents group: red for cancer (any subtype), green for control



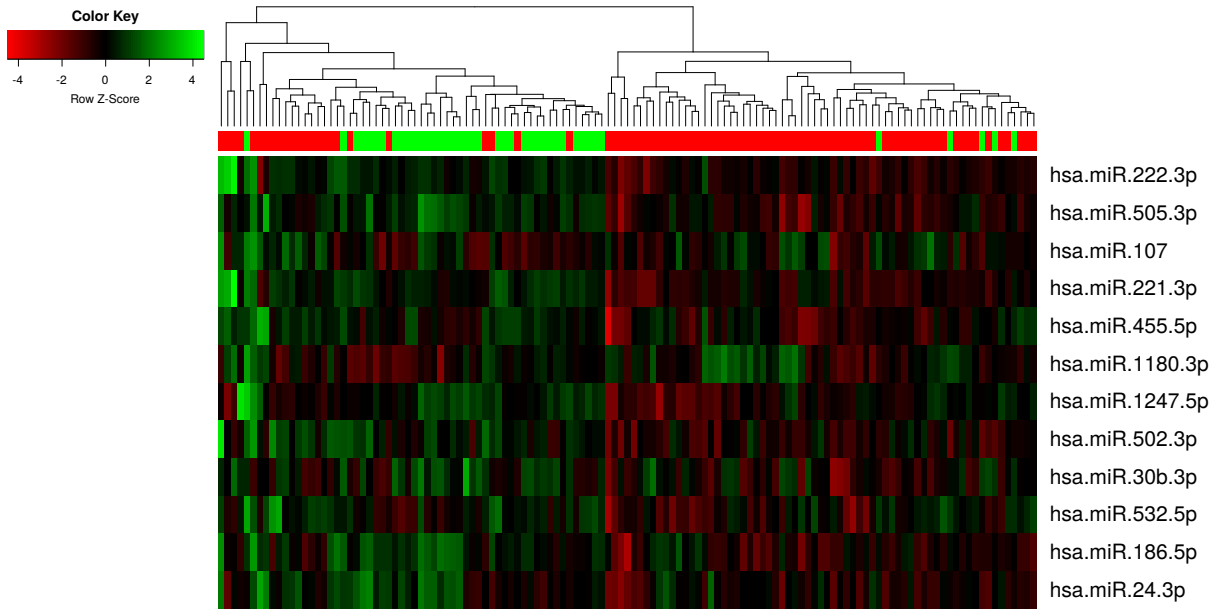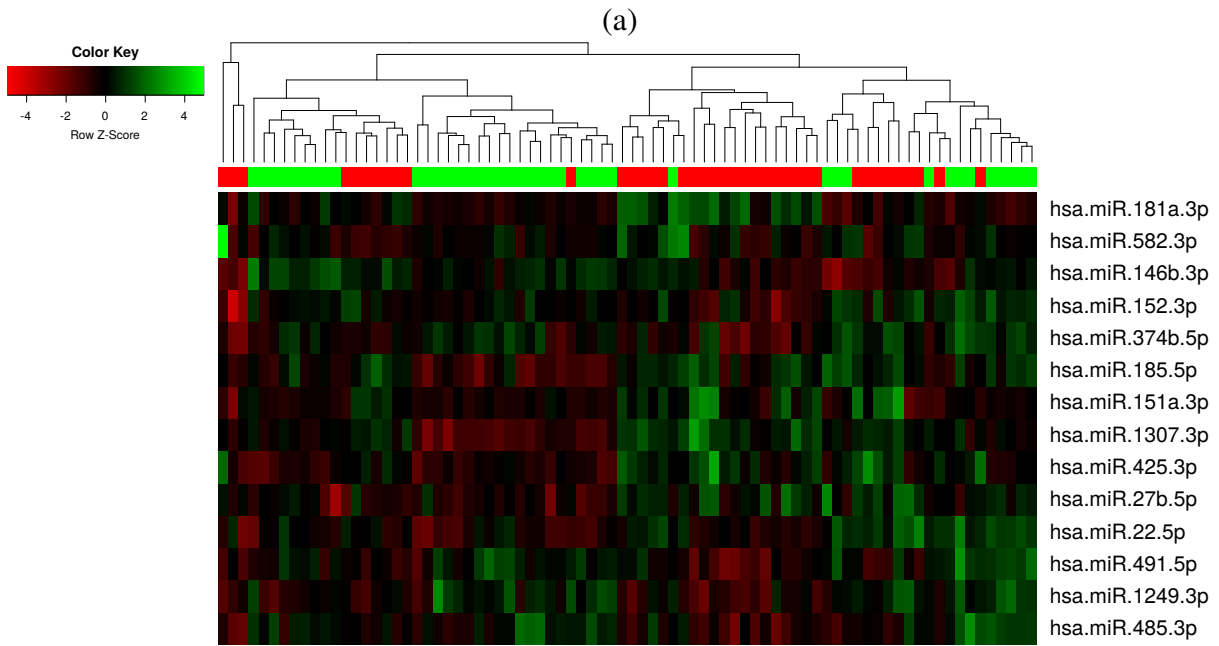

(b)

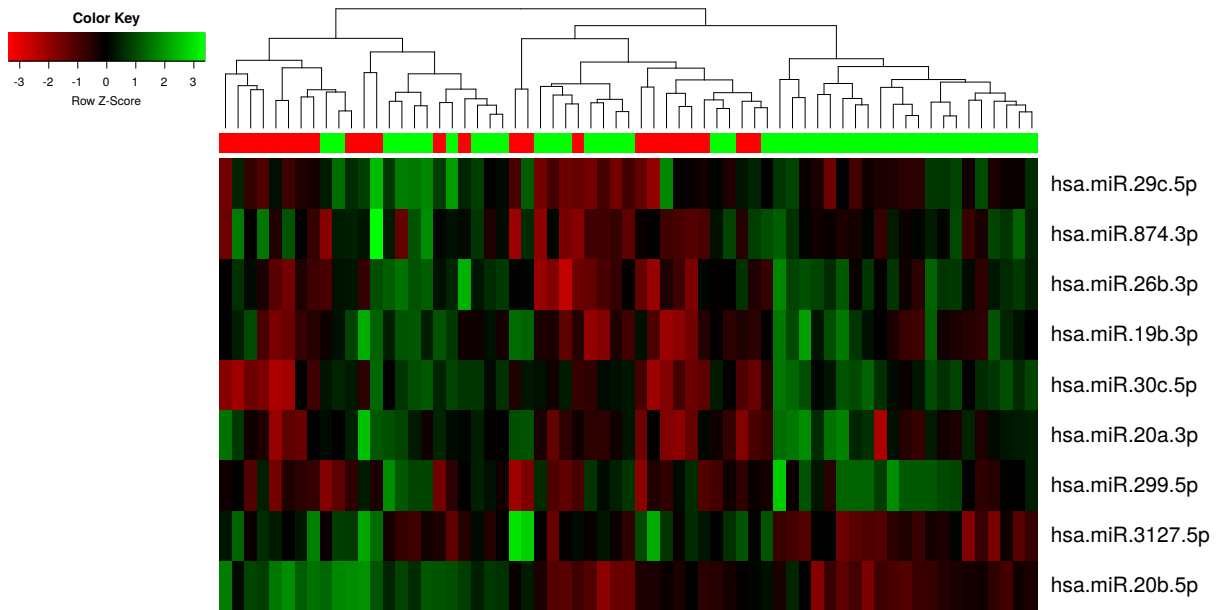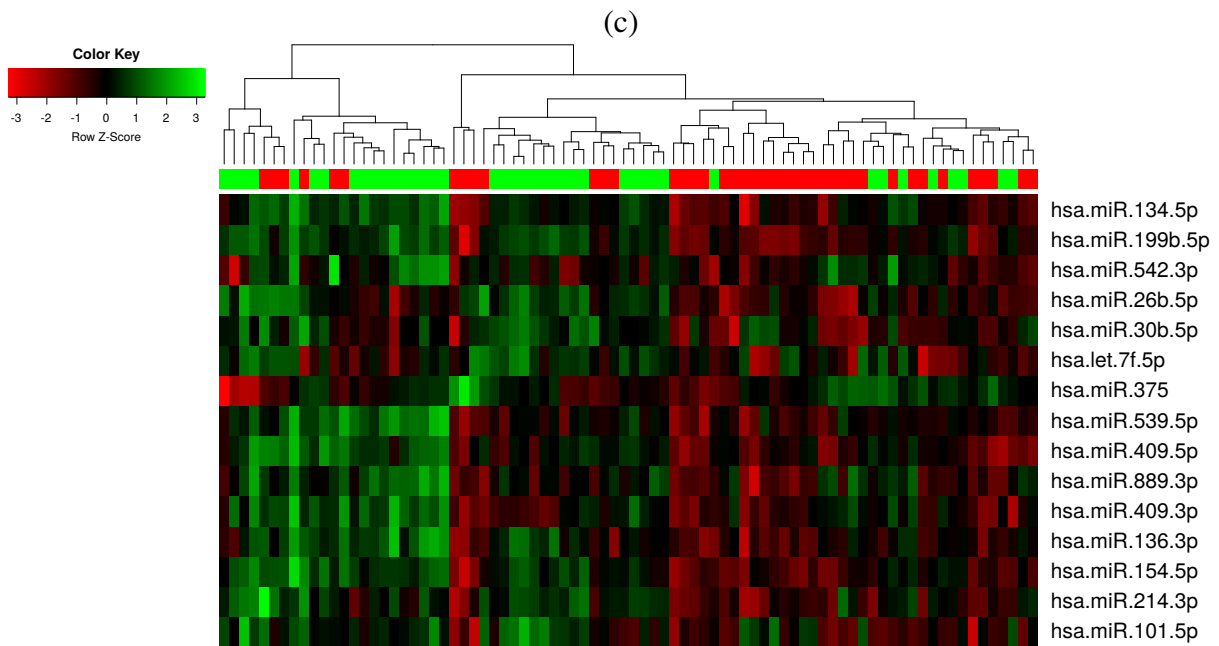

(d)

Figure S12: Clustering analysis of miRNA expression for (a) LA, (b) LB, (c) HER2-E and (d) BL subtypes with control patients. Color of the top bar represents group: red for cancer, green for control

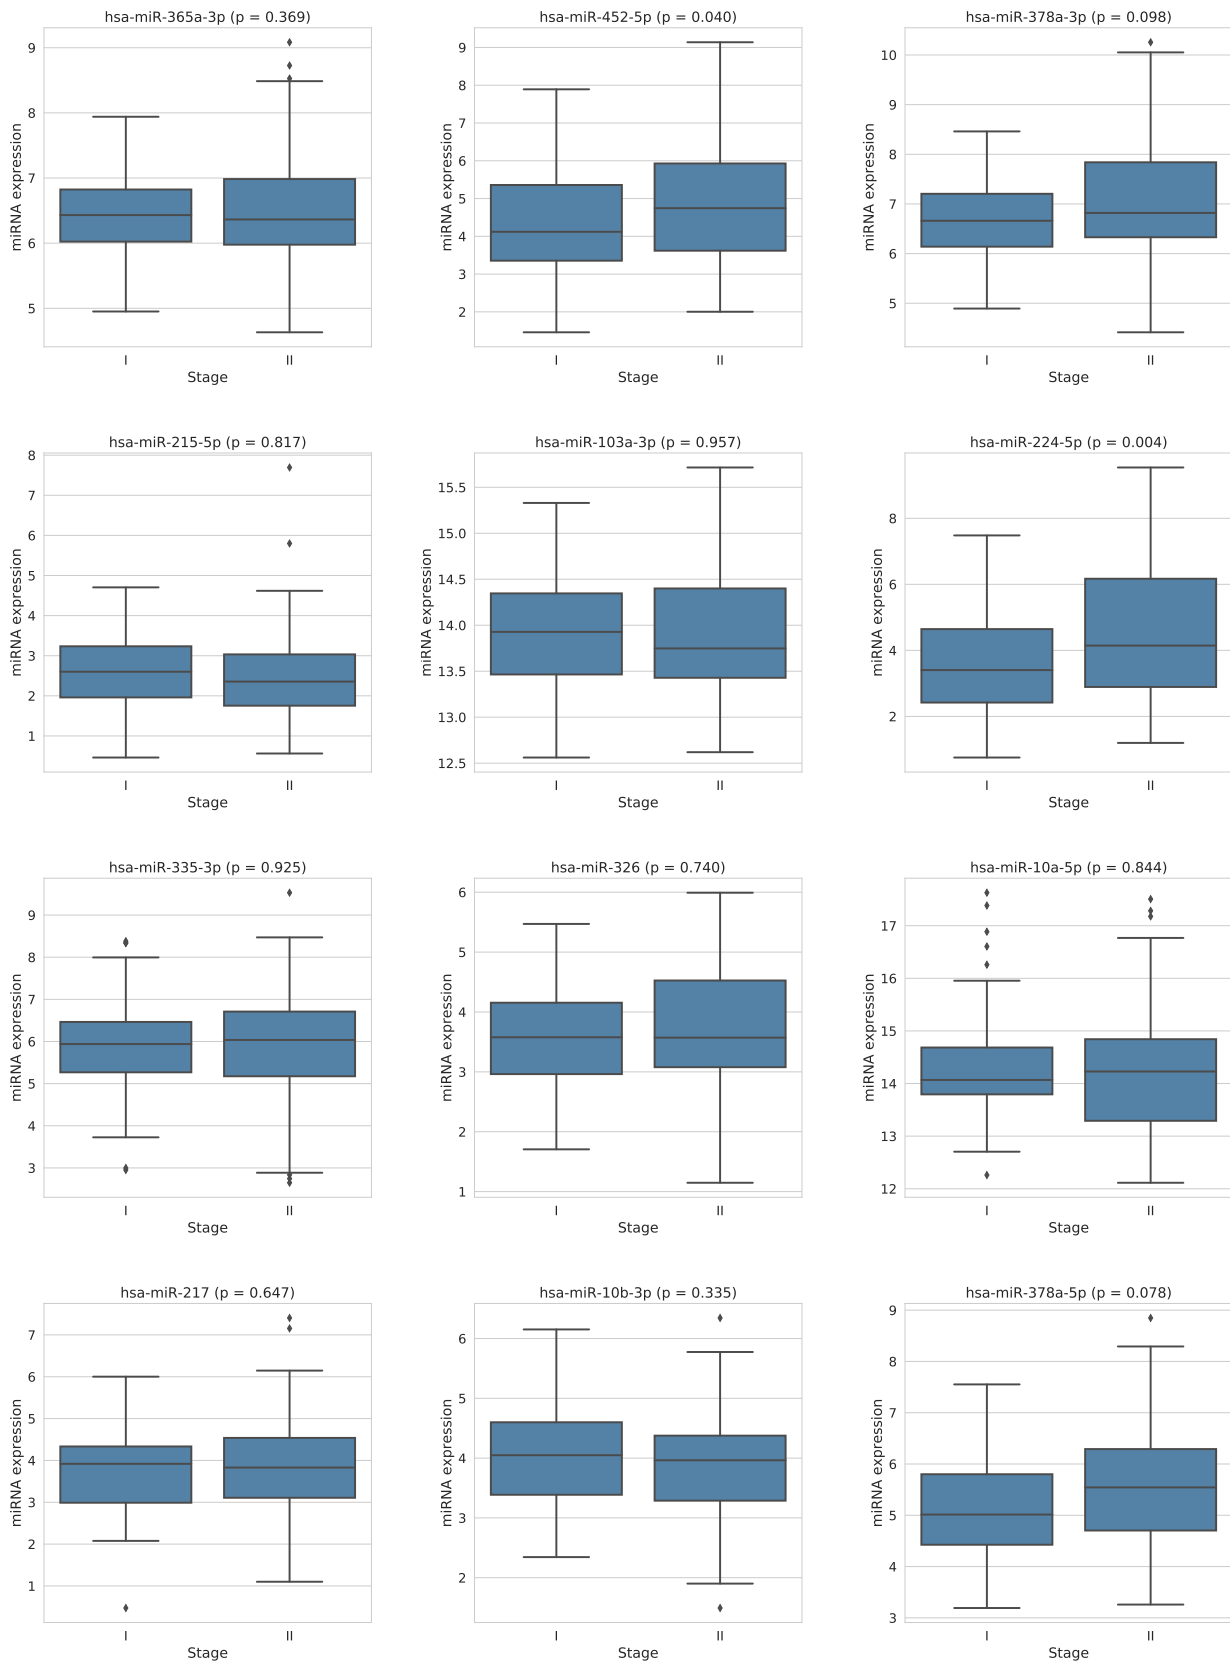

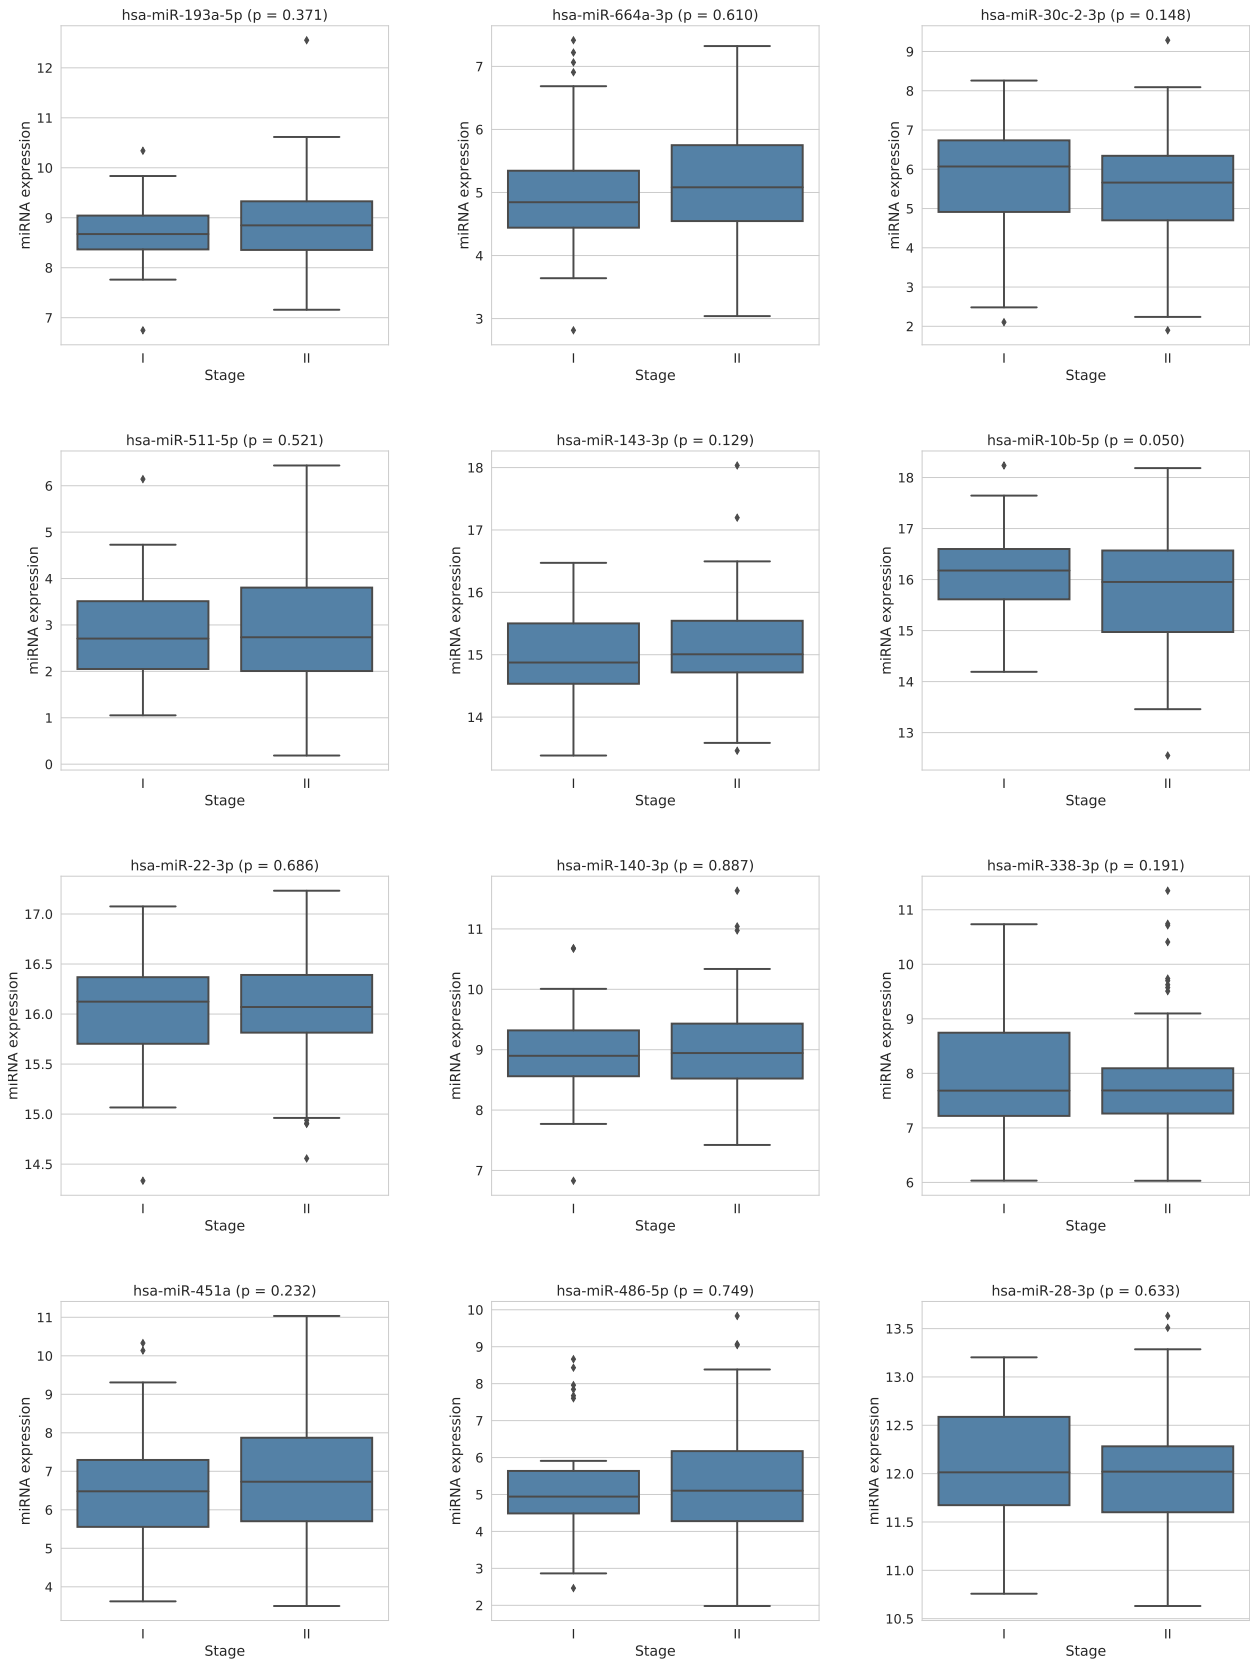

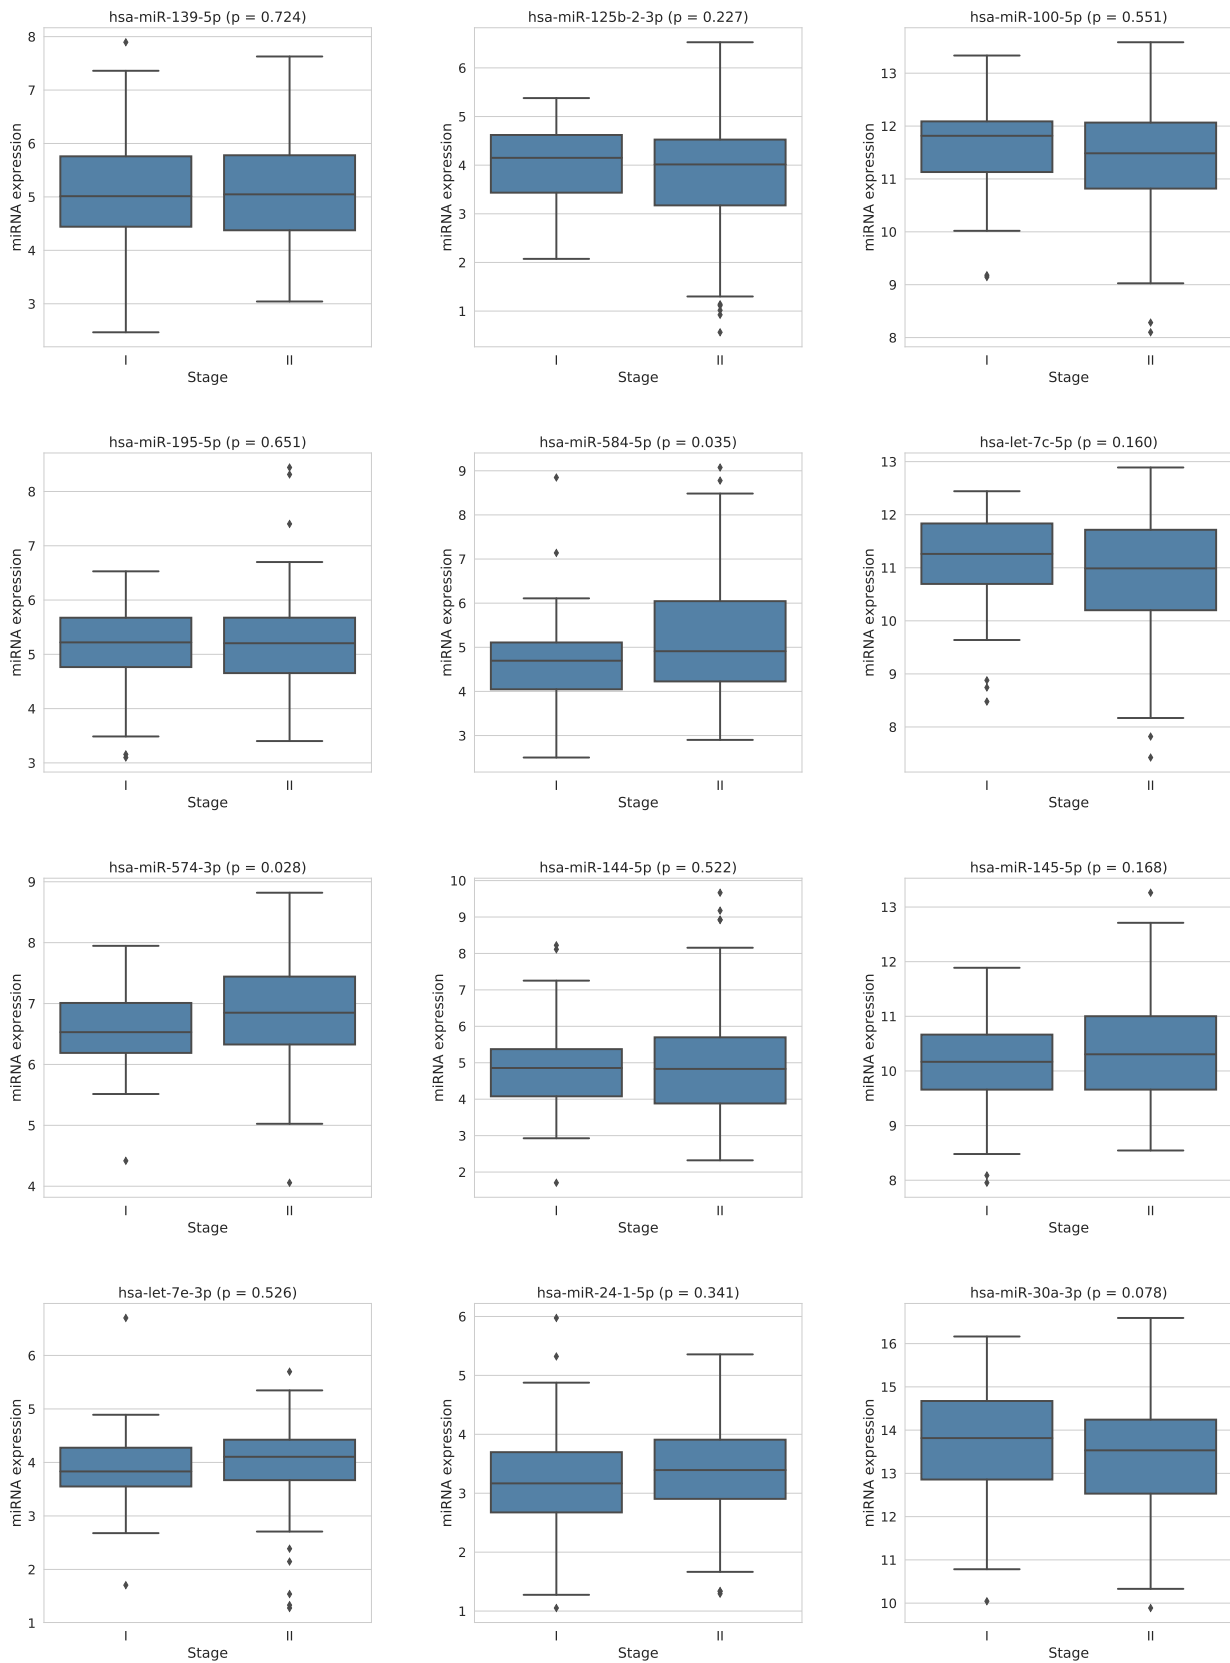

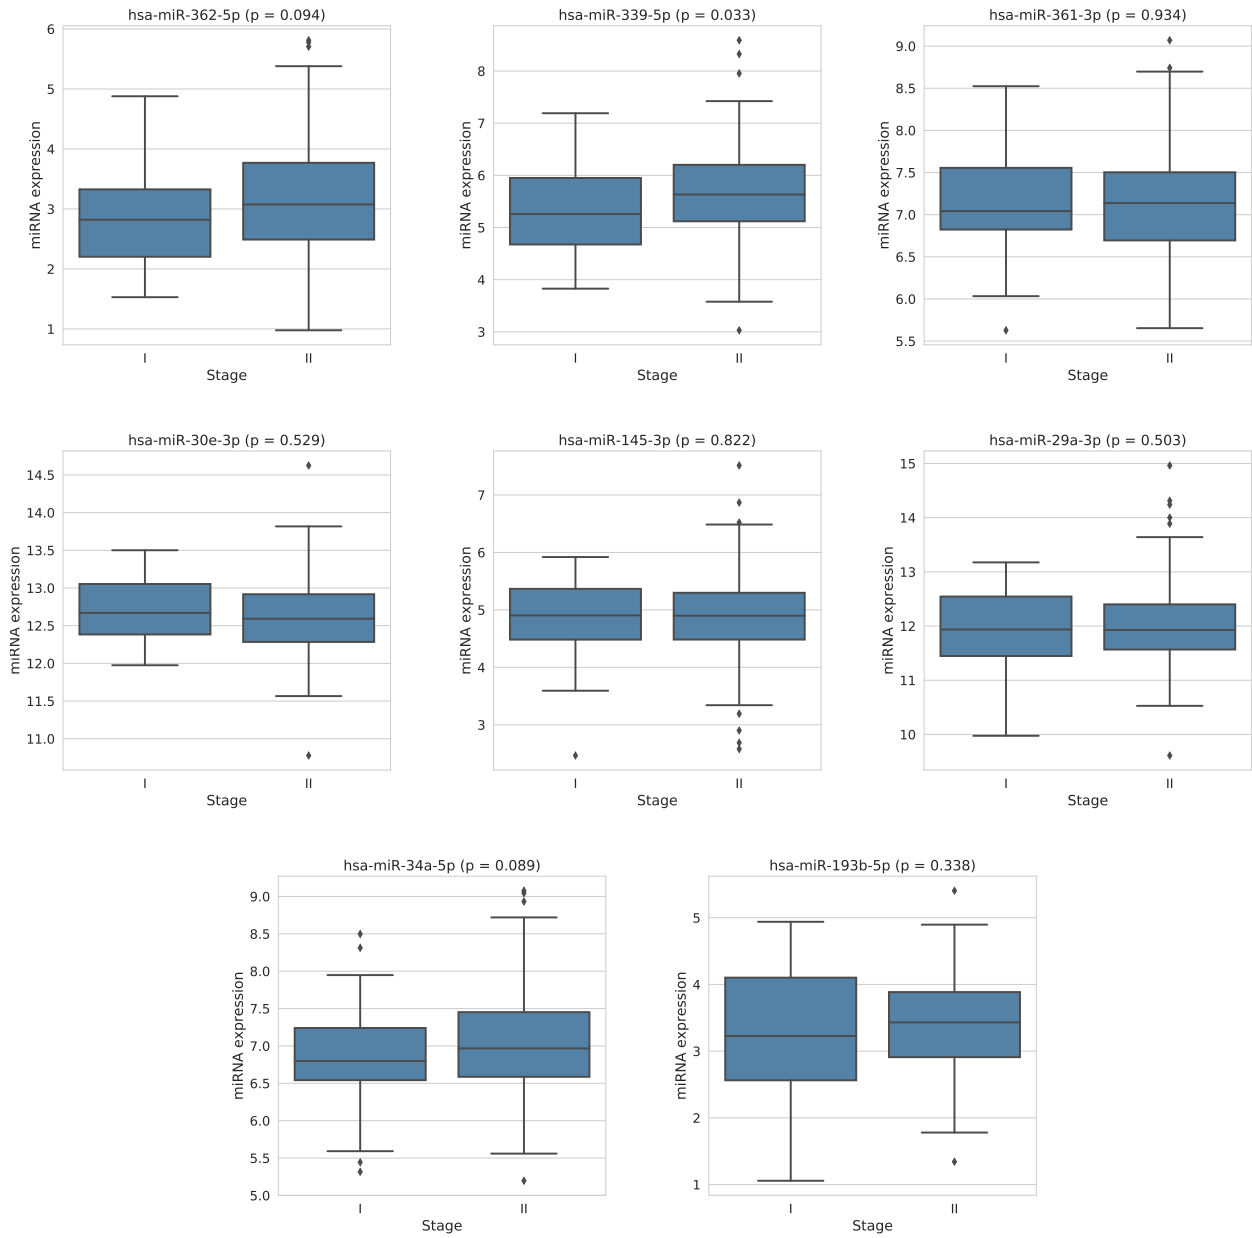

(a)

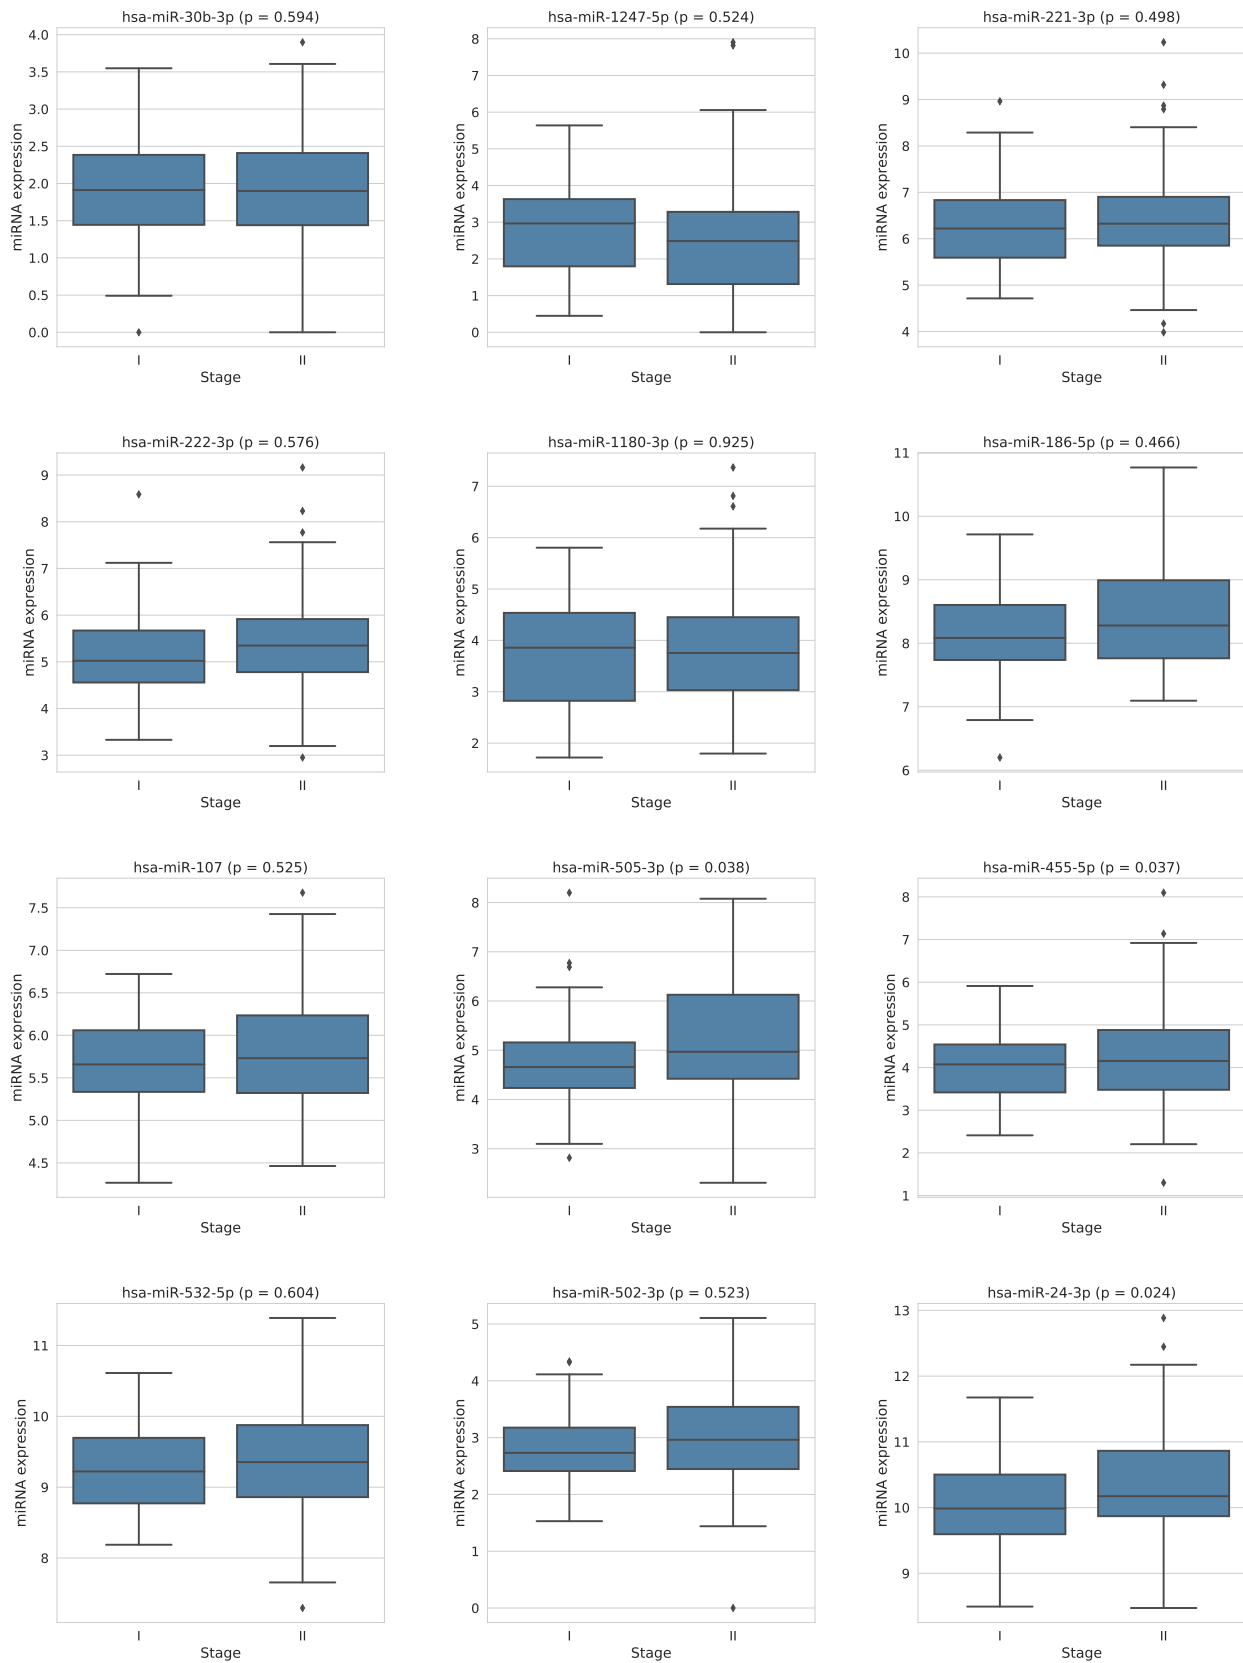

(b)

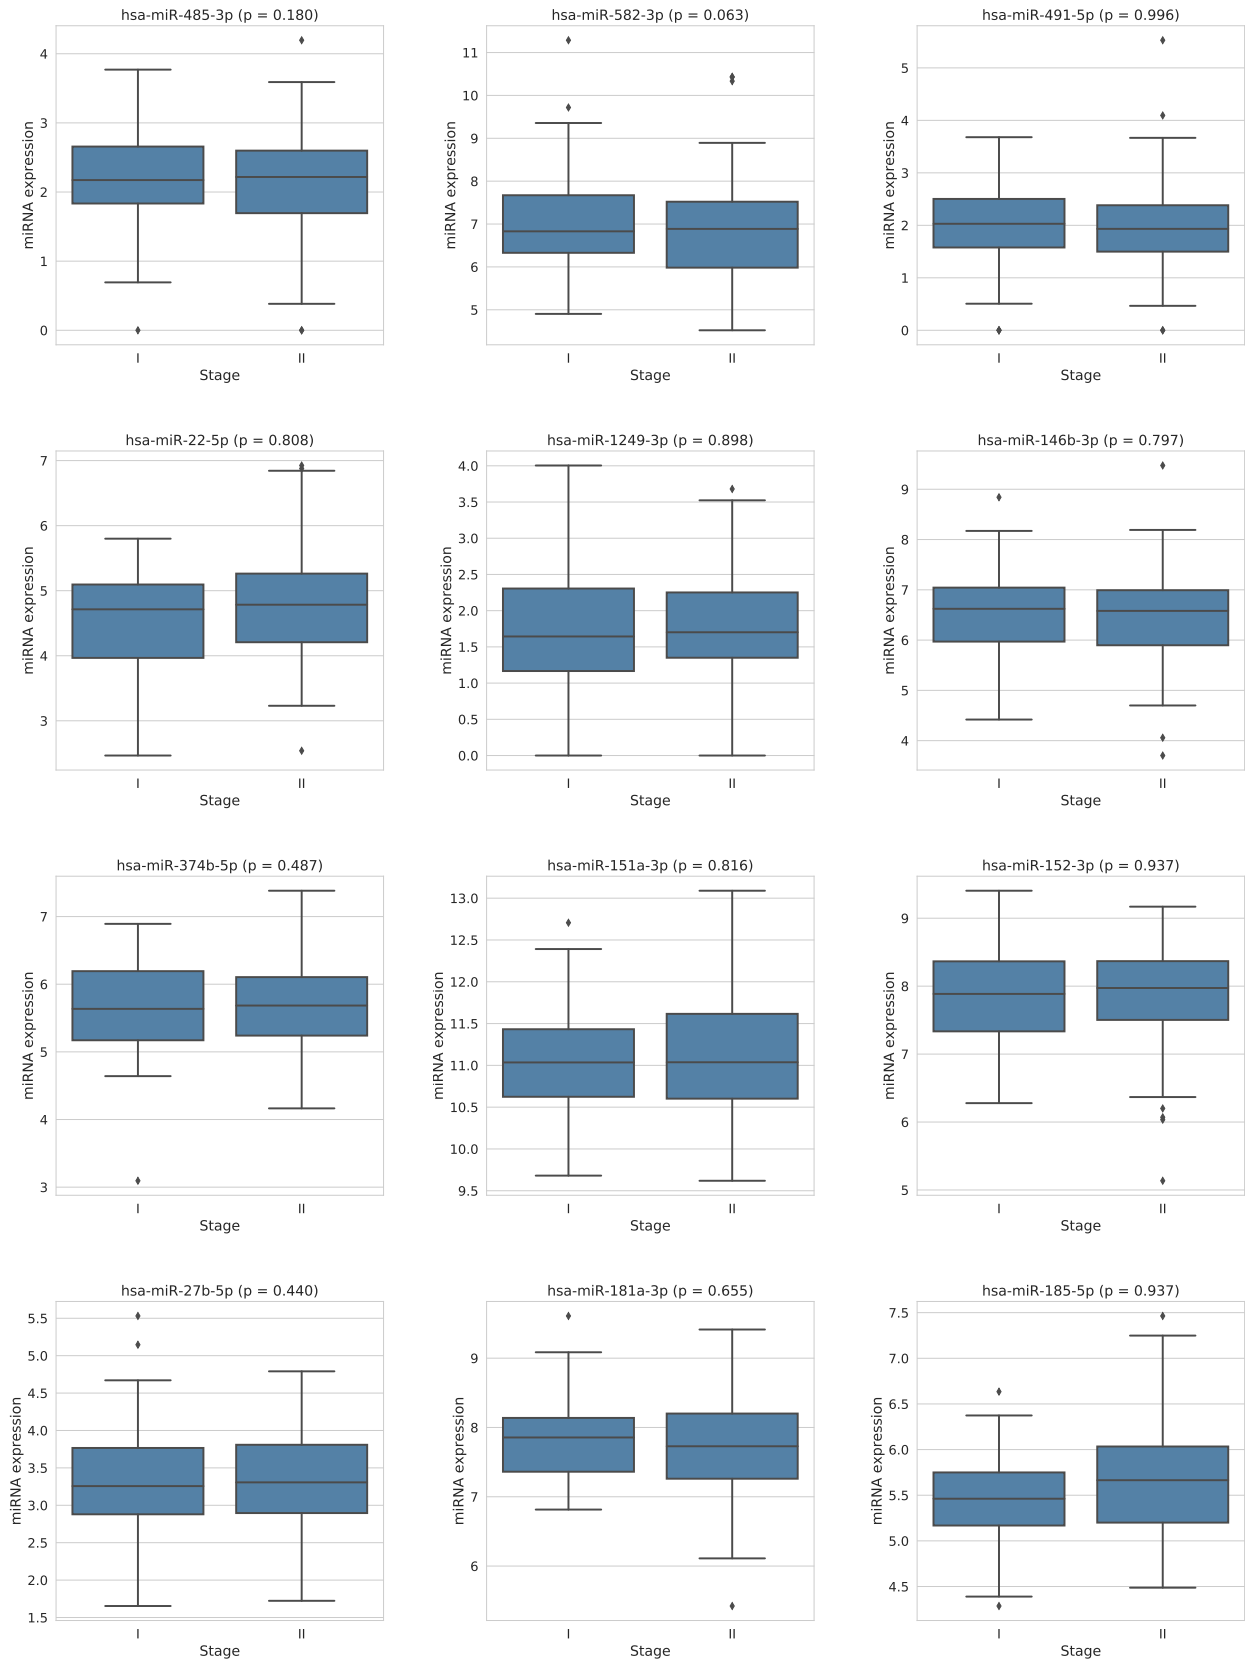



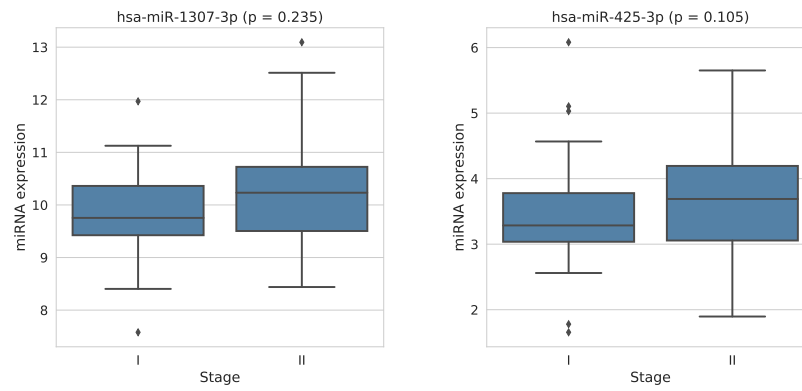

(c)

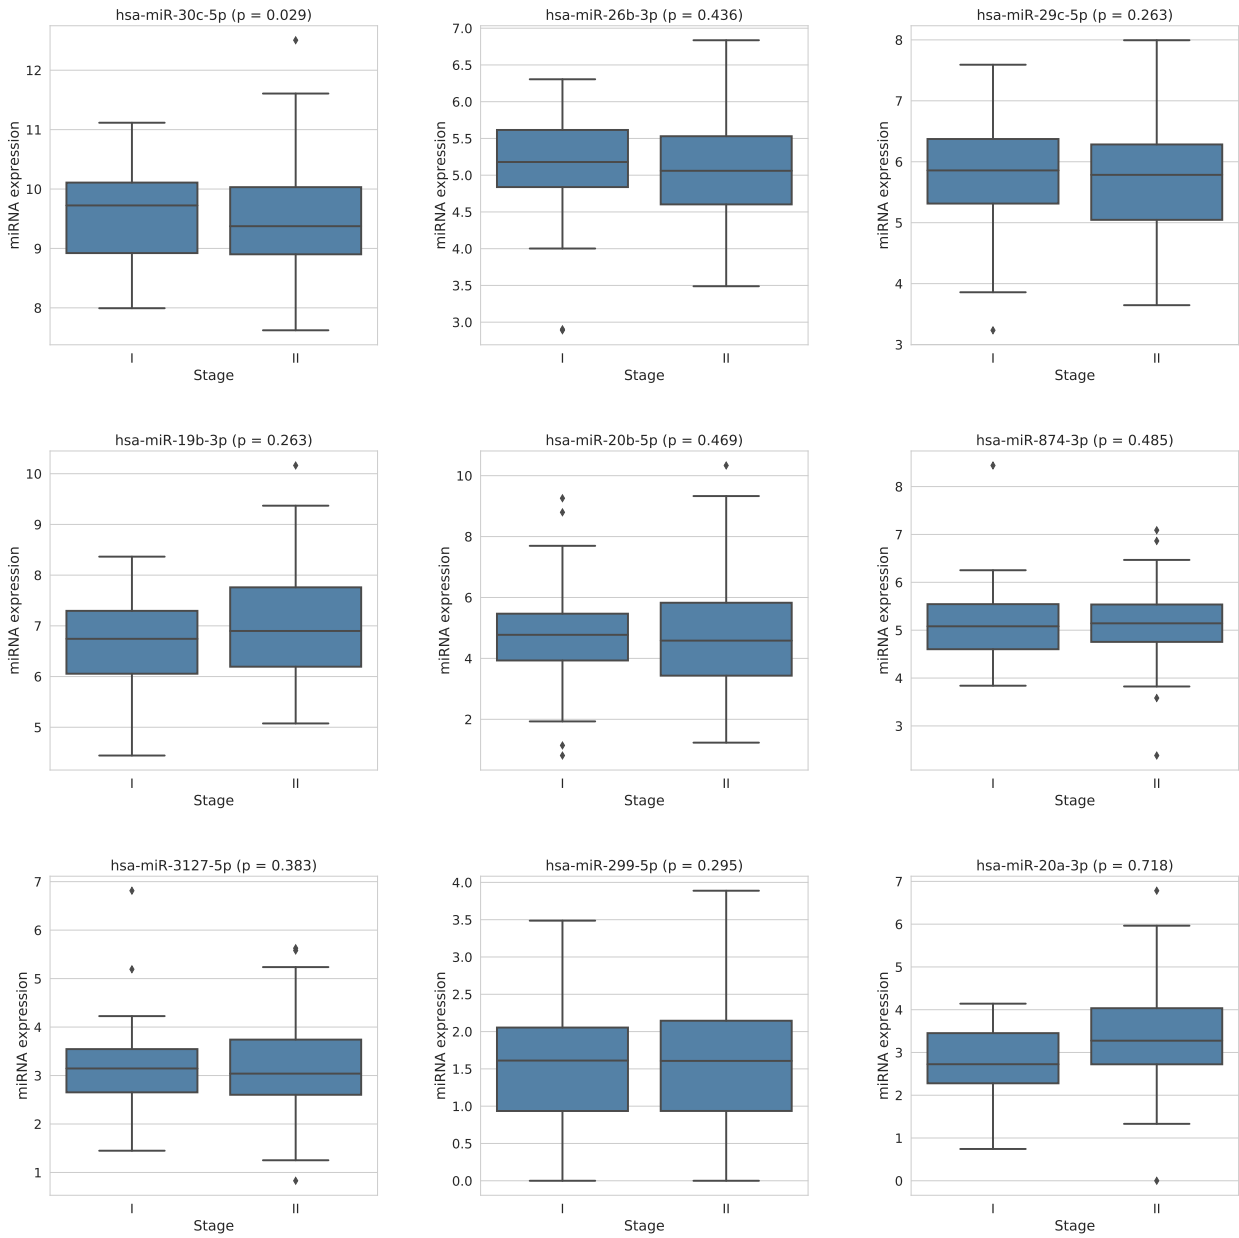

(d)

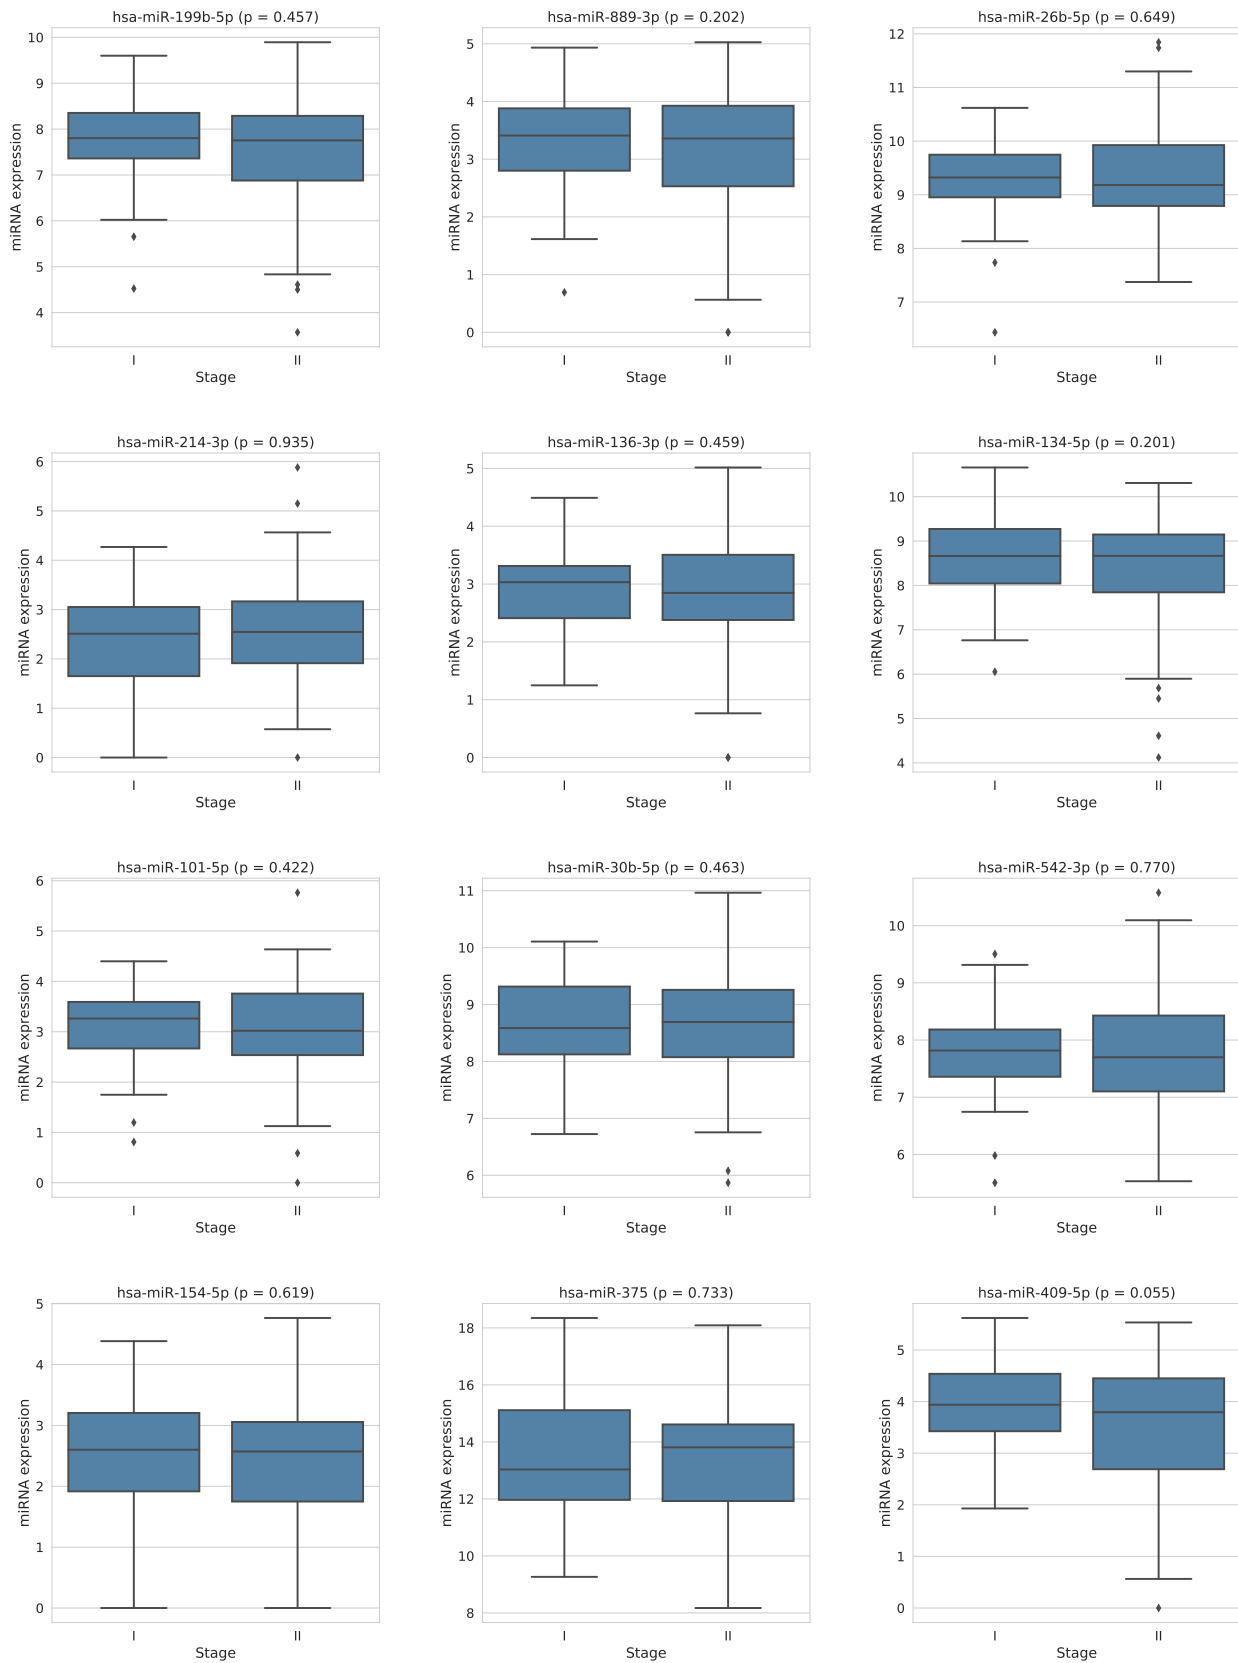

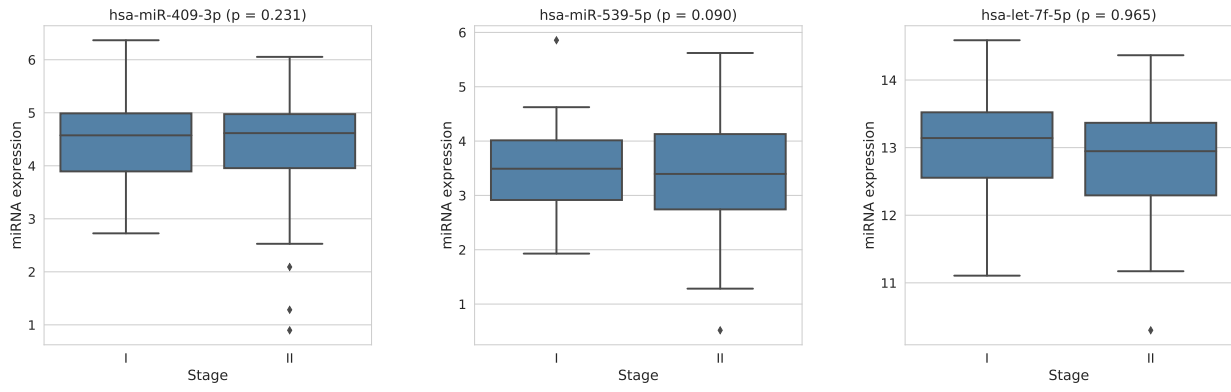

(e)

Figure S13: Boxplots showing the expression in cancer stages I and II for (a) 4-star miRNAs and 1-star miRNAs for (b) LA, (c) LB, (d) HER2-E and (e) BL



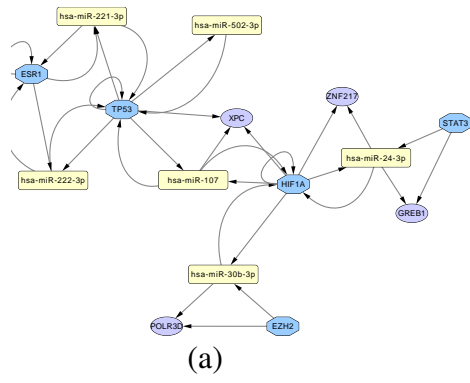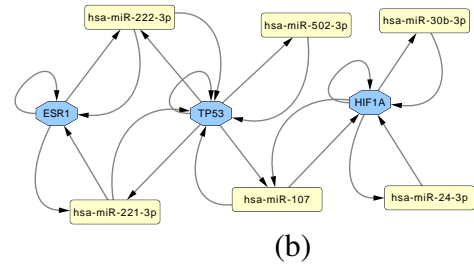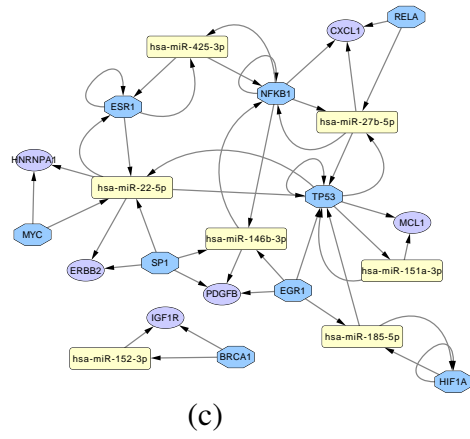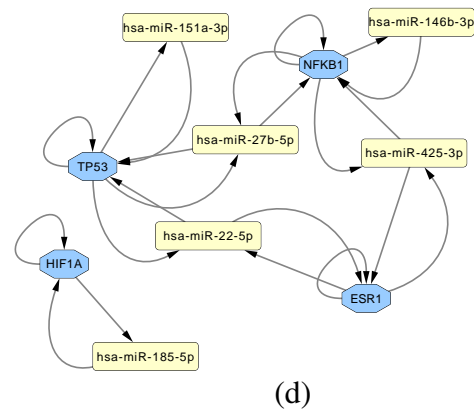

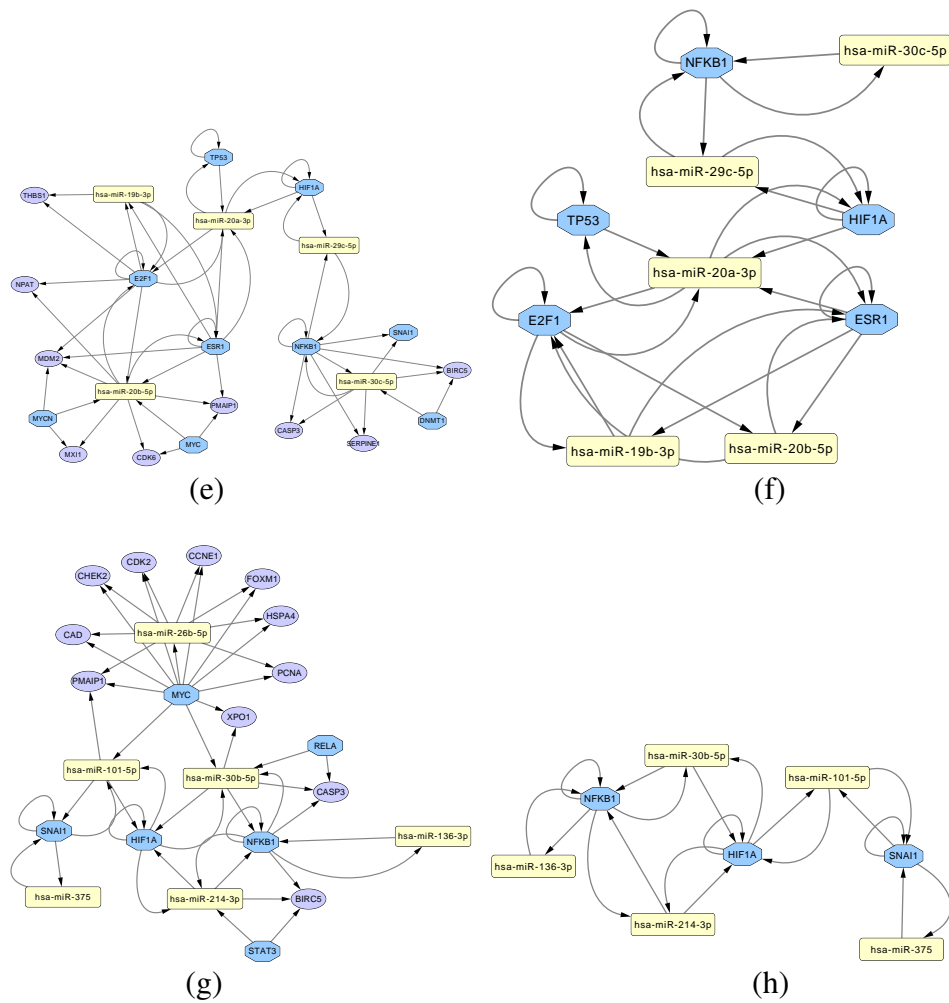

Figure S15: Regulatory networks of miRNAs (yellow rectangles), genes (purple ellipses) and transcription factors (blue octagons) for the 1-star miRNAs: LA (a, b), LB (c, d), HER2-E (e, f) and BL (g, h). Full networks are on the left and the ones only showing loops are on the right

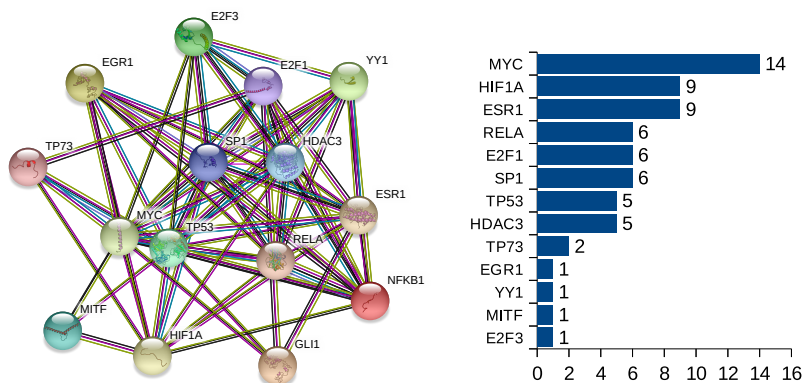

(a)

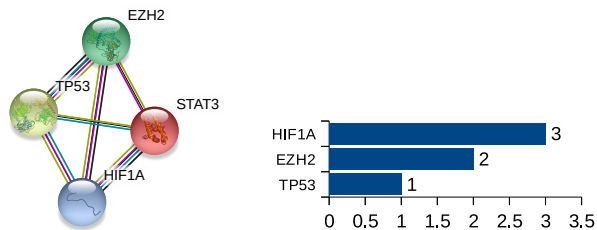

(b)

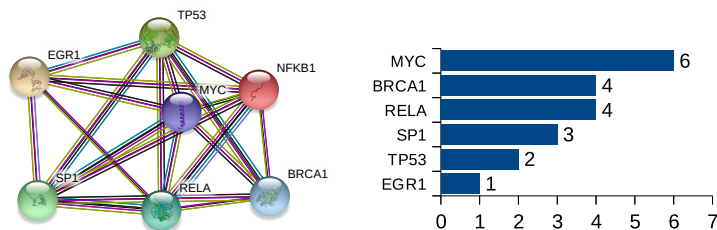

(c)

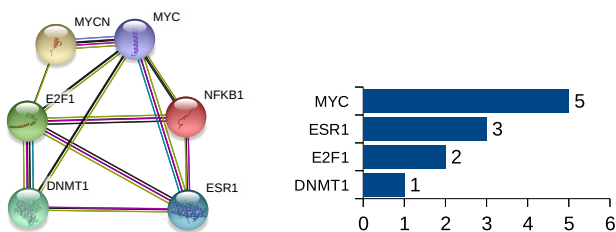

(d)

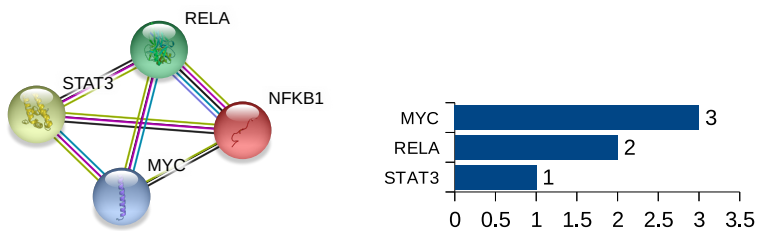

(e)

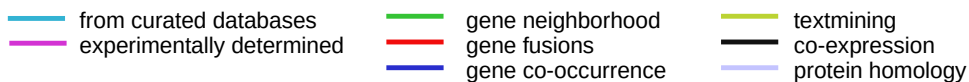

Figure S16: Protein-Protein Interaction networks for (a) 4-star and 1-star miRNAs for (b) LA, (c) LB, (d) HER2-E and (e) BL. The barplots show the degree (number of interactions) of each node in the Protein-Protein interaction networks. Colors of edges represent protein-protein association type, as indicated in the legend. Node colors are for aesthetic purposes
